# TITLE PAGE

## Title:

Immediate effect of osteopathic techniques on human resting muscle tone in healthy subjects using myotonometry: A factorial randomized trial

## Author information:

Lucas Bohlen, MSc ([lbohlen@osteopathie-schule.de](mailto:lbohlen@osteopathie-schule.de)) <sup>1\*</sup>

Jonah Schwarze, MSc ([jschwarze@osteopathie-schule.de](mailto:jschwarze@osteopathie-schule.de)) <sup>1</sup>

Jannik Richter, MSc ([jannikrichter@gmx.net](mailto:jannikrichter@gmx.net)) <sup>2,3</sup>

Bernadette Gietl, MSc ([bernadette.gietl@gmx.de](mailto:bernadette.gietl@gmx.de)) <sup>2,3</sup>

Christian Lazarov, BSc ([c.lazarov@gmx.de](mailto:c.lazarov@gmx.de)) <sup>2,3</sup>

Anna Kopyakova, MSc ([anna.kopyakova@gmail.com](mailto:anna.kopyakova@gmail.com)) <sup>4</sup>

Andreas Brandl, MSc ([brandl.andreas@stud.diploma.de](mailto:brandl.andreas@stud.diploma.de)) <sup>5</sup>

Dr. Dr. Tobias Schmidt, MSc ([to.schmidt@asklepios.com](mailto:to.schmidt@asklepios.com)) <sup>1</sup>

## Affiliations:

<sup>1</sup> Osteopathic Research Institute, Osteopathie Schule Deutschland, Hamburg, Germany.

<sup>2</sup> Osteopathie Schule Deutschland, Hamburg, Germany.

<sup>3</sup> Dresden International University, Dresden, Germany.

<sup>4</sup> Erasmus School of Economics, Erasmus University Rotterdam, Rotterdam, Netherlands.

<sup>5</sup> DIPLOMA Hochschule, Bad Sooden-Allendorf, Germany.

## \*Corresponding author:

**Name:** Lucas Bohlen; **Postal code:** Mexikoring 19, 22297 Hamburg, Germany; **E-Mail:**

[lbohlen@osteopathie-schule.de](mailto:lbohlen@osteopathie-schule.de).

NOTE: This preprint reports new research that has not been certified by peer review and should not be used to guide clinical practice.

## **ABSTRACT**

### **Background:**

Musculoskeletal disorders (MSDs) are highly prevalent, burdensome, and putatively associated with an altered human resting muscle tone (HRMT). Osteopathic manipulative treatment (OMT) is commonly and effectively applied to treat MSDs and reputedly influences the HRMT. Arguably, OMT may modulate alterations in HRMT underlying MSDs. However, there is sparse evidence even for the effect of OMT on HRMT in healthy subjects.

### **Methods:**

A 3x3 factorial randomised trial was performed to investigate the immediate-term effect of myofascial release (MRT), muscle energy (MET), and soft tissue techniques (STT) on the HRMT of the corrugator supercilii (CS), superficial masseter (SM), and upper trapezius muscles (UT) in healthy subjects in Hamburg, Germany. Participants were randomised into three groups (1:1:1 allocation ratio) receiving treatment, according to different muscle-technique pairings, over the course of three sessions with one-week washout periods. Primarily, we assessed the effect of osteopathic techniques on muscle tone (F), biomechanical (S, D), and viscoelastic properties (R, C) from baseline to follow-up (main effect) and tested if specific muscle-technique pairs modulate the effect pre- to post-intervention (interaction effect) using the MyotonPRO (at rest). Data were analysed using descriptive (mean, standard deviation, quantiles, and simple effect) and inductive statistics (Bayesian ANOVA).

### **Results:**

59 healthy participants were randomised into three groups and two subjects dropped out from one group (n=20; n=20; n=19 and n=17, respectively). The CS produced frequent measurement errors and was excluded from analysis. The main effect

## Osteopathy and Muscle Tone

changed significantly for F (-0.163 [0.060];  $p=0.008$ ), S (-3.060 [1.563];  $p=0.048$ ), R (0.594 [0.141];  $p<0.001$ ), and C (0.038 [0.017];  $p=0.028$ ) but not for D (0.011 [0.017];  $p=0.527$ ). The interaction effect did not change significantly ( $p>0.05$ ). No adverse events were reported.

### **Conclusion:**

OMT modified the HRMT in healthy subjects which may inform future research on MSDs. In detail, MRT, MET, and STT reduced the muscle tone (F), decreased biomechanical (S not D), and increased viscoelastic properties (R and C) of the SM and UT (CS was not measurable) at immediate term. However, the effect on HRMT was not modulated by muscle-technique interaction.

### **Trial registration:**

German Clinical Trial Register (DRKS00020393).

### **Key words:**

Osteopathy; Osteopathic techniques; Osteopathic manipulative treatment; Muscle tone; Human resting muscle tone; Biomechanical muscle properties; Viscoelastic muscle properties; Musculoskeletal disorders, MyotonPRO.

## INTRODUCTION

### **Background:**

Globally, musculoskeletal disorders (MSDs) accounted for ~1.3 billion prevalent and ~334.7 million incident cases in 2017 [1]. Notably, most of the prevalence and incidence is attributable to gout, rheumatoid arthritis, osteoarthritis, neck pain (NP), and low back pain (LBP) [2, 3]. In 2017, MSDs were the main contributor to global disability and LBP was the leading cause of disability since 1990 [4]. Similarly, the global costs of MSDs due to health expenditure and production loss are reported to be immense [5]. However, these high health costs mismatch with low research investments [6] and policy responses are thus required to close the gap [7]. Hence, MSDs are highly prevalent, burdensome, and costly.

In primary care, musculoskeletal pain should be managed according to current best evidence and practice recommendations, which report beneficial effects of manual therapy but merely endorse adjunct treatment [8] due to limited high-quality evidence [9]. Still, patients with MSDs like LBP seem to prefer non-surgical [10] and non-pharmacological interventions [11] of whom manual therapy provides the best evidence for immediate-term reduction of pain and disability in acute and subacute non-specific LBP [12]. Hence, patients with MSDs may consult an osteopath in primary care - depending on varying country regulations and professional recognitions across the world [9, 13]. Osteopathic practice should, in turn, adhere to established treatment recommendations, which it arguably does (**Box 1**).

## Box 1 | Osteopathic practice and musculoskeletal care recommendations

A recent systematic review of high-quality clinical practice guidelines put forward 11 recommendations for best practice care in musculoskeletal pain conditions emphasising: (1) patient centred care, (2) screening for red flags, (3) assessing of psychosocial factors, (4) using imaging only selectively, (5) carrying out a physical examination, (6) recording the patients' progress, (7) providing patient education, (8) fostering physical activity and exercise, (9) applying manual therapy in multimodal care setting, (10) offering non-surgical care first, and (11) keeping patients working [8]. Arguably, osteopathy fulfils most of the criteria by: (1) being a patient-centered, or even person-centered, care approach [14, 15], (2) using an initial biomedical screening for red flags/serious underlying pathology [16], (3) assessing, and putatively influencing, psychosocial factors [17, 18], (4) using imaging only occasionally and mostly by referral [19, 20], (5) always carrying out physical examinations [21], (6) keeping patient records to monitor progress [20], (7) providing patient education [13, 22], (8) giving advice on physical activity and exercise [13, 23], (9) using manual therapy and recognizing the need for multimodal care [24], (10) offering non-surgical care, sometimes before and/or after surgery [25], and (11) aiming to promote the patient's return to work [26, 27].

Osteopathy is a person-centered approach to healthcare that aims to enhance, restore, or maintain the patient's (self-regulation of) structure, function, and well-being [13, 21]. Therefore, osteopaths employ both manual (e.g., touch, palpation, and manipulation) and patient management approaches (e.g., patient education, psychological support, lifestyle advice, and self-management solutions) [28]. In practice, palpatory findings are interpreted according to an osteopathic clinical reasoning process [16] that considers biopsychosocial perspectives [29] and osteopathic models of care [30]. These findings are then treated using osteopathic manipulative treatment (OMT) [31], which encompasses different approaches (e.g., direct, indirect, and combined methods) and techniques (e.g., myofascial release, muscle energy, and soft tissue techniques) [32] (Box 2).

## Box 2 | Overview about myofascial release, muscle energy, and soft tissue techniques

Herein, we provide an overview about the definition, mechanisms, and effects of three manual techniques frequently used in the osteopathic field: (1) **Myofascial release technique (MRT)**: (1.1) **Definition**: MRT uses pressure and stretch with low load and long duration (which are adjusted based on palpatory feedback) to release myofascial tissues [33, 34]; (1.2) **Mechanisms**: MRT is underlined by mechanisms that are not fully understood [35, 36], however, it seems to induce fibroblasts to upregulate

## Osteopathy and Muscle Tone

the production of anti-inflammatory cytokines and growth factors [37]; and **(1.3) Effects:** MRT shows mixed results for treating painful (often chronic) musculoskeletal conditions [33, 34, 38] as it reduces pain and improves function in patients with cLBP [39] while reducing disability, but not pain, in patients with LBP [40]; **(2) Muscle energy technique (MET):** **(2.1) Definition:** MET involves instructing the patient to voluntarily contract muscles into a controlled direction against the therapist counter-pressure [41]; **(2.2) Mechanisms:** MET has unclear mechanisms of action with some speculating changes in proprioception, inflammation, and fluid circulation [42] and others emphasising post-isometric relaxation and reciprocal inhibition [43]; and **(2.3) Effects:** MET is effective in improving pain, disability, and range of motion in symptomatic and asymptomatic subjects, specifically in chronic MSDs like cLBP [43]; and **(3) Soft tissue technique (STT):** **(3.1) Definition:** STT applies stretch, traction and/or deep pressure to soft tissues [32]; herein, we used repeated, slow, and deep pressure gliding strokes applied with the thumb alongside the muscle fibres, which is a STT that is similar to muscle stripping massage [44-46]; **(3.2) Mechanisms:** STT (or therapeutic massage, respectively) might work through mechanotransduction [47, 48] albeit other biomechanical, physiological, neurological, and psychological mechanisms are not to be disregarded [49, 50]; and **(3.3) Effects:** STT (or massage therapy, respectively) benefits patients with LBP [51, 52] and improves pain and function in patients with cLBP in the short-term [50].

OMT is primarily, but not exclusively, applied to treat musculoskeletal pain conditions like back pain [53] employing, among others, spinal [54] and visceral manipulations [55]. Current evidence suggests that osteopathic treatment may improve pain and function in patients with spinal complaints [56], including chronic NP [57] and acute and chronic non-specific LBP [58-60] even during pregnancy and postpartum [61]. OMT was recommended for patients with LBP [31], indicated to benefit medical care [62], proposed to be included within chronic pain management guidelines [63], and even reported to be dominant and cost-effective compared to usual care in the management of LBP and NP, respectively [64]. Still, the current body of evidence lacks robustness due to methodological shortfalls and counterevidence is available as well [65-67].

Taken together, MSDs and OMT are complex health conditions and interventions, respectively. Both are underlined by mechanisms that are poorly understood [30, 68] and associated with various biological, psychological, and social factors [69, 70].

## Osteopathy and Muscle Tone

However, of particular interest is that both MSDs [71, 72] and OMT [73-76] are reputed to be associated with changes in muscle tone. On the one hand, alterations in lumbar myofascial tone and stiffness seem to contribute to the development of LBP [77] and may be linked to underlying pathologies and symptoms [71, 72]. On the other hand, manual osteopathic treatment is assumed to alter muscle tone and stiffness [73-76], for example, of paraspinal muscles in patients with LBP [71]. Therefore, we hypothesise that a putative mechanism of action underpinning the treatment of MSDs with OMT might be the modulation of muscle tone.

In general, muscle tone relates to the resting tension of the tissue in response to stretch. A differentiation can be drawn between: (1) active muscle tone: relating to the electrical activity within muscle cells; and (2) passive muscle tone: relating to the intrinsic biomechanical and viscoelastic properties of the muscle [72, 78]. The human resting muscle tone (HRMT) broadens the concept of passive muscle tone to include other connective tissues thereby accounting for the passive/resting tension of all continuous myofascial tissues involved in the body's biotensegrity system [79]. It was suggested that the HRMT is generated by 'slowly cycling cross-bridges' between myosin heads and actin filaments [77, 79, 80]; however, other molecular and cellular mechanisms have been put forward and further research is required to conclusively determine the mechanisms underlying the HRMT [81].

Notably, the HRMT seems to be particularly relevant to clinical and manual practice [79]. Still, previous studies assessing the presumed effect of osteopathy on muscle tone used palpation and electromyography (EMG) as measures [82-84]. However, manual palpation is reported to be unreliable [85-92] and EMG is not informative of

## Osteopathy and Muscle Tone

the HRMT [79]. Nonetheless, it appears imperative to detect these changes in research and practice. Thus, the use of a myotonometer was emphasized to reduce the subjectivity in determining the HRMT [71, 81]. An objective and reliable myotonometer is the MyotonPRO which induces oscillations in the muscle fibres as a means of quantifying biomechanical and viscoelastic muscle properties [71, 72, 93].

### **Objectives:**

Hence, in this study, we assessed the effect of osteopathic modalities on the HRMT in healthy subjects using the MyotonPRO to inform future research on MSDs. In detail, three osteopathic techniques with different characteristics (myofascial release technique [MRT], muscle energy technique [MET], and soft tissue technique [STT]) were used to influence the HRMT of three muscles with different sizes and thicknesses (corrugator supercilii muscle [CS], superficial masseter muscle [SM], and upper trapezius muscle [UT]) (**Box 3**). Primarily, we evaluated whether osteopathic techniques influence the tone (F), biomechanical (S and D) and viscoelastic (R and C) properties of these muscles in all groups from baseline to follow-up using the MyotonPRO (main effect). Secondly, we investigated if muscle-technique pairs modulate the putative effect in each group from pre- to post-intervention using the MyotonPRO (interaction effect). For the primary objective, we hypothesized that osteopathic techniques reduce the muscle tone (F) and biomechanical properties (S and D) and increase the viscoelastic properties (R and C). For the secondary objective, we hypothesized that the predicted changes in muscle properties of the CS, SM, and UT are preferentially achieved through MRT, MET, and STT, respectively.

### **Box 3 | Muscle characteristics**

The CS, SM, and UT were selected for this study due to their apparent differences in size and thickness. However, the availability of data on both size and thickness were scattered and the values given below are to be interpreted with caution.



## Osteopathy and Muscle Tone

In detail, it has been reported that the relaxed muscle thickness of the (1) CS ranges between 5 and 6 mm [94]; (2) SM ranges between 9 and 15 mm (notably, values account for the combined thickness of the superficial and deep part of the masseter muscle and are thus exaggerated) [95], and (3) UT ranges between 11 and 12 mm [96]. No data was available on the surface size of these muscles. Hence, we calculated an approximate surface size based on data reporting the length and width of these muscles (which is imprecise as it does not account for factors like muscle shape). In detail, we calculated a surface size for the (1) CS of ~3.69 cm<sup>2</sup> (length: 29.24 mm; width: 12.62 mm) [97]; (2) SM of ~24.40 cm<sup>2</sup> (length: 6.32 cm; width: 3.86 cm) [98]; and (3) UT of ~540 cm<sup>2</sup> (length: 45 cm; width: 12 cm) (notably, this data is based on a myocutaneous trapezius flap and likely imprecise) [99].

## METHODS

### Trial design:

This single-blinded 3x3 factorial randomised trial was conducted in Hamburg, Germany. No changes to the methods were made after trial commencement. The study is largely reported according to the CONSORT statement [100, 101] since there are currently no specific guidelines available for randomised trials using a factorial design [102]. This study has obtained informed consent from participants, was carried out in accordance with the Declaration of Helsinki [103] and was approved by the ethics committee of the Osteopathic Research Institute (Nr. 020-01). The study was prospectively registered within the German Clinical Trial Register (DRKS00020393).

### Trial procedure:

Participants were randomly allocated into three groups (G1, G2, and G3) undergoing three treatment periods (t1-t3). During each period, each group received treatment with the same osteopathic technique but applied by another practitioner to another muscle. Over the course of the trial, all three groups were treated (1) with all three osteopathic techniques (MRT, MET, and SST); (2) at all three muscles (CS, SM, and

## Osteopathy and Muscle Tone

UT); and (3) by all three practitioners (P1, P2, P3). However, the muscle-technique-practitioner combination was distinct for each group during each period (Table 1). All interventions and measurements were applied (1) to the right side of the participant's body to ensure comparability, and (2) in relaxed supine position to maintain resting muscle state. The trial comprised one-week washout periods between baseline (t0) and each session (t1-t3). A session consisted of one intervention day which encompassed 5 minutes of measurement, followed by 5 minutes of treatment, and renewed 5 minutes of measurement per subject. Participants started with 5 minutes delay to one another to allow measurement by one assessor who was not involved with the interventions. In this trial, all groups were intervention groups that were treated at one muscle per session, while all three muscles were measured. Thus, measures from untreated muscles were used as control values (Table 2).

**Table 1 | Trial procedure**

|                 |                   | <b>G1</b> | <b>G2</b> | <b>G3</b> |
|-----------------|-------------------|-----------|-----------|-----------|
| <b>Period 1</b> | <i>Technique:</i> | MRT       | MRT       | MRT       |
|                 | <i>Muscle:</i>    | UT        | SM        | CS        |
|                 | <i>Therapist:</i> | P2        | P1        | P3        |
| <b>Period 2</b> | <i>Technique:</i> | MET       | MET       | MET       |
|                 | <i>Muscle:</i>    | SM        | CS        | UT        |
|                 | <i>Therapist:</i> | P3        | P2        | P1        |
| <b>Period 3</b> | <i>Technique:</i> | STT       | STT       | STT       |
|                 | <i>Muscle:</i>    | CS        | UT        | SM        |
|                 | <i>Therapist:</i> | P1        | P3        | P2        |

**Legend:** P1 = practitioner 1; P2 = practitioner 2; P3 = practitioner 3; MRT = myofascial release technique; MET = muscle energy technique; STT = soft tissue technique; CS = corrugator supercilii muscle; SM = superficial masseter muscle.

## Osteopathy and Muscle Tone

**Table 2 | Controls**

|          |    |                   |
|----------|----|-------------------|
| Period 1 | G1 | CS (control)      |
|          |    | SM (control)      |
|          |    | UT (intervention) |
|          | G2 | CS (control)      |
|          |    | SM (intervention) |
|          |    | UT (control)      |
|          | G3 | CS (intervention) |
|          |    | SM (control)      |
|          |    | UT (control)      |
| Period 2 | G1 | CS (control)      |
|          |    | SM (intervention) |
|          |    | UT (control)      |
|          | G2 | CS (intervention) |
|          |    | SM (control)      |
|          |    | UT (control)      |
|          | G3 | CS (control)      |
|          |    | SM (control)      |
|          |    | UT (intervention) |
| Period 3 | G1 | CS (intervention) |
|          |    | SM (control)      |
|          |    | UT (control)      |
|          | G2 | CS (control)      |
|          |    | SM (control)      |
|          |    | UT (intervention) |
|          | G3 | CS (control)      |
|          |    | SM (intervention) |
|          |    | UT (control)      |

**Legend:** shaded boxes = intervention (treated muscles); non-shaded boxes = controls (untreated muscles). **Explanation:** During each period, the groups (G1, G2, G3) were treated at one muscle (intervention) while the other two muscles remained untreated (control). However, all three muscles were measured. Thus, the measures of the untreated muscles were used as control values for the treated muscles. For example, in period 1, G1 was treated (and measured) at the UT, whereas the UT was not treated (but measured) in G2 or G3. Hence, the control values for the treated muscle in each group were generated by the untreated muscles in the other two groups.

### Participants:

Three undergraduate classes of osteopathy students were recruited from the Osteopathie Schule Deutschland in Hamburg, Germany. The sample was limited to healthy subjects from this specific setting. The eligibility criteria were specified to include participants between 18 and 50 years old and exclude participants with health complaints (particularly muscle disorders) to minimise the risk of age- [104, 105] and disease-related [106] changes of the musculature.

## **Interventions:**

Three manual techniques from the osteopathic field (MRT, MET, and STT) were selected and administered for ~5 minutes. These osteopathic techniques were applied with the aim of modifying the HRMT in healthy participants and were adjusted to fit the structure and function of each muscle. A consensus training was implemented prior to the trial to ensure that all therapists applied the interventions coherently. During the first session, MRT was applied to the right CS (G3), SM (G2), and UT (G1). During the second session, MET was applied to the right CS (G2), SM (G1), and UT (G3). During the third session, STT was applied to the right CS (G1), SM (G3), and UT (G2) (Table 1). Overall, the interventions were chosen to represent the broad range of osteopathic techniques and their diverse characteristics comprising: (1) direct, indirect, and combined techniques; (2) active and passive techniques; and (3) techniques with high- and low-pressure or counterforce [32, 107].

### ***Myofascial Release Technique (MRT):***

MRT is an indirect (or direct) and passive technique using low pressure. The muscle is palpated (covering origin and insertion) and guided alongside the path of least resistance into a position of ease [108], thereby following the tissues' micro-movements away from the restricted barrier until a release occurs (Figure 1).

### ***Muscle Energy Technique (MET):***

MET is a direct and active technique using counterforce. The therapist brings the muscle into a position of stretch and holds it at the restriction barrier. The participant then performs an isometric contraction of the muscle (with 25% of

## Osteopathy and Muscle Tone

maximum effort/force) away from this restricted barrier and against the therapist's counterforce [109]. After approximately 3-6 seconds of contraction, the participant relaxes, and the therapist adjusts the tissue towards its renewed movement/restriction barrier while following the tissue's micro-movements. This post-isometric relaxation approach is repeated 3-6 times (**Figure 1**).

### ***Soft Tissue Technique (STT):***

STT is a direct and passive technique using high pressure. The therapist applies repeated longitudinal deep pressure gliding strokes with the thumb alongside the muscle fibres of the CS (from origin towards insertion), SM (from origin towards insertion), and UT (from insertion towards origin). This is similar to the treatment of a trigger band according to the fascial distortion model [110] but is applied to palpably firm muscle fibres and their fascial surroundings (**Figure 1**).

**Figure 1 was removed from the preprint due to identifying information**

**Figure 1** | Osteopathic techniques; **Legend:** red arrows = therapists' motion; black arrows = participants' motion; four-headed arrows = motion applied in all directions.

### **Outcomes:**

We used the handheld digital palpation device MyotonPRO [Version 5.0.0] as the outcome measure (**Figure 2**). This myotonometer assesses the muscle's tone, biomechanical and viscoelastic properties using five parameters by means of dynamic oscillation mechanosignals [81, 111] (**Table 3**). The MyotonPRO is a valid and reliable measurement tool for healthy and diseased participants [112, 113] (**Box**

4) that has been applied to evaluate muscle tone, muscle stiffness, and HRMT in multiple studies investigating various structures and conditions [71, 81, 93, 114-116]. The myotonometer measurements were carried out at all three sessions (t1-t3) before and after the treatment intervention. Measurement points (MPs) were predefined for the myotonometer measurements of each muscle prior to the trial (Box 5). MPs were identified by manual palpation following anatomical landmarks. All MPs were marked before each session using a dermatological skin marker pen.

Figure 2 was removed from the preprint due to identifying information

Figure 2 | MyotonPRO; Legend: Not applicable.

Table 3 | MyotonPRO parameters

| Parameter                                    | Description                                                                                                                                                                                           | Formula                                        |
|----------------------------------------------|-------------------------------------------------------------------------------------------------------------------------------------------------------------------------------------------------------|------------------------------------------------|
| F - Oscillation Frequency                    | Measures the muscle's tone in resting state (excluding voluntary contractions like depicted within an EMG measurement) in Hertz (Hz)                                                                  | $F = f_{max}$                                  |
| S - Dynamic Stiffness                        | Measures the biomechanical property of a muscle to deform its shape under internal or external force in Newton meter (N/m)                                                                            | $S = \frac{a_{max} \cdot m_{probe}}{\Delta l}$ |
| D - Logarithmic Decrement                    | Measures the elasticity characterized by the muscle's natural oscillation (which represents the biomechanical ability to regain its initial shape after deformation under internal or external force) | $D = \ln\left(\frac{a_1}{a_3}\right)$          |
| R - Mechanical Stress Relaxation Time        | Measures the time the muscle tissue needs to recover its shape after deformation under internal or external force in milliseconds (ms)                                                                | $R = t_R - t_1$                                |
| C - Ratio of deformation and Relaxation time | Measures the gradual elongation of muscle tissue over time under constant tensile stress                                                                                                              | $C = \frac{R}{t_1 - t_T}$                      |

#### Box 4 | Validity and reliability of the MyotonPRO

The MyotonPRO shows good validity and high reliability for measuring, for example, the trapezius muscle [117]. In detail, studies demonstrate moderate to excellent inter-rater reliability (intra-class correlation coefficient [ICC] for F = 0.87, S = 0.79, D = 0.93, R = 0.65, C = 0.50; standard error of measurement [SEM] for F = 0.7, S = 16.8, D = 0.2, R = 1.4, C = 0.1), moderate to good intra-rater reliability (ICC for F = 0.81, S = 0.82, D = 0.76, R = 0.74, C = 0.52; SEM for F = 0.8, S = 16.9, D = 0.2, R = 1.2, C = 0.1) [118], and good to excellent test-retest reliability (ICC for S = 0.821-0.913; SEM for S = 23.59) [119].

## Box 5 | Measurement points (MPs)

The MP for the: (1) CS was determined to be located 0.5 cm superior to the supraorbital notch slightly above the eyebrow [120, 121]; (2) SM was determined to be located just below the midpoint of a virtual line between the muscle's origin and attachment (masseteric tuberosity of the mandibular angle and the tendinous aponeurosis at the anterior third of the zygomatic arch) [122, 123]; and (3) UT was determined to be located halfway between a virtual line from the top of the acromion to the spinous process of C7 (which is ~ 19.5 cm) [81, 124] (notably, MPs were inspired, not determined, by the cited references).

## Sample size:

The sample size was calculated prospectively using G\*Power, which is a power analysis for ANOVA with repeated measures (within-between interaction) [125, 126]. We assumed a type I error level of 0.05 and statistical power of 95%. Based on an estimated partial  $\eta^2$  of 0.1 (unpublished data), an effect size of 0.33, and three measurements and four groups, a total sample size of 52 participants was calculated. Using an estimated drop-out rate of 15%, the sample size was planned with 60 participants.

## Randomisation:

The sample was randomly allocated into three groups (G1, G2, G3) by block randomization (1:1:1 allocation ratio) using computer-generated allocation schedule (<http://www.randomization.com>). Furthermore, we randomly assigned which technique would be applied in which period by throwing the dice. Afterwards, we randomly assigned the muscles and therapists to the groups and periods in the same manner. The principal investigator generated the random allocation sequence, enrolled participants, and assigned them to sequences of intervention while having no clinical involvement in the trial. Treatments were scheduled according to

allocation sequence and therapists and participants were first introduced to each other during the respective sessions.

### **Blinding:**

Participants and statisticians, but not therapists and assessors, were blinded to the conditions. However, we assume that blinding was compromised because the participants were osteopathy students that were likely able to distinguish between the interventions.

### **Statistical methods:**

The outcomes from myotonometer measurements were assessed by calculating the within-participant difference of each parameter for all groups between t1 and t3 (primary objective) and the between-participant difference of each parameter for each group between pre- and post-treatment of each session (secondary objective). Statistical analysis was conducted by employing the software R Studio. Myotonometer properties (F, S, D, R, and C) were used as parameters and converted into factors. Heidelberger & Welch's diagnostic was used to run length diagnostic and convergence diagnostic. The descriptive statistic for the primary objective was presented by mean, standard deviation, and quantiles, whereas the secondary objective was presented by standard deviation, quantiles, and simple effect. Due to the limitations of standard repeated measures ANOVA for categorical variables and unbalanced data, the inductive statistics for the primary and secondary objectives as well as subgroup analysis were calculated using the Bayesian version of the repeated-measures analysis of variance (BANOVA) [127]. The p-values of the multiple comparisons were adjusted using the Bayesian model [128]. The



significance level was set to 5% ( $p \leq 0.05$ ). Missing completely at random values were included for further analysis. Missing at random and missing not at random values were excluded as they are dependent on one factor and bias the results [129].

## RESULTS

Overall, 82 participants were screened and 23 declined to participate or had scheduling issues. The remaining 59 participants were randomly allocated into groups, leading to a sample of 20 participants for groups G1 and G2, and 19 participants for the G3 group. Two participants from group G3 cancelled their participation in the study due to personal reasons and were excluded from interventions and analysis prior to the first period. Therefore, the first trial period started with the final sample size ( $n=57$ ) distributed across groups as follows: G1 ( $n=20$ ), G2 ( $n=20$ ), and G3 ( $n=17$ ). Unfortunately, some participants missed scheduled appointments and thereby allocated interventions and measurements. These participants were not excluded from study participation and data was included for analysis unless all three periods were missed, which did not occur. In detail, appointments were missed during the: (1) first period by two participants from group G1 and one participant from group G2; (2) second period by three participants from group G3; and (3) third period by five participants from group G1, two participants from group G2, and two participants from group G3 (Figure 3).

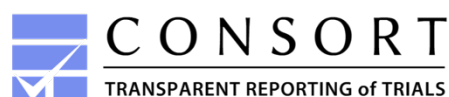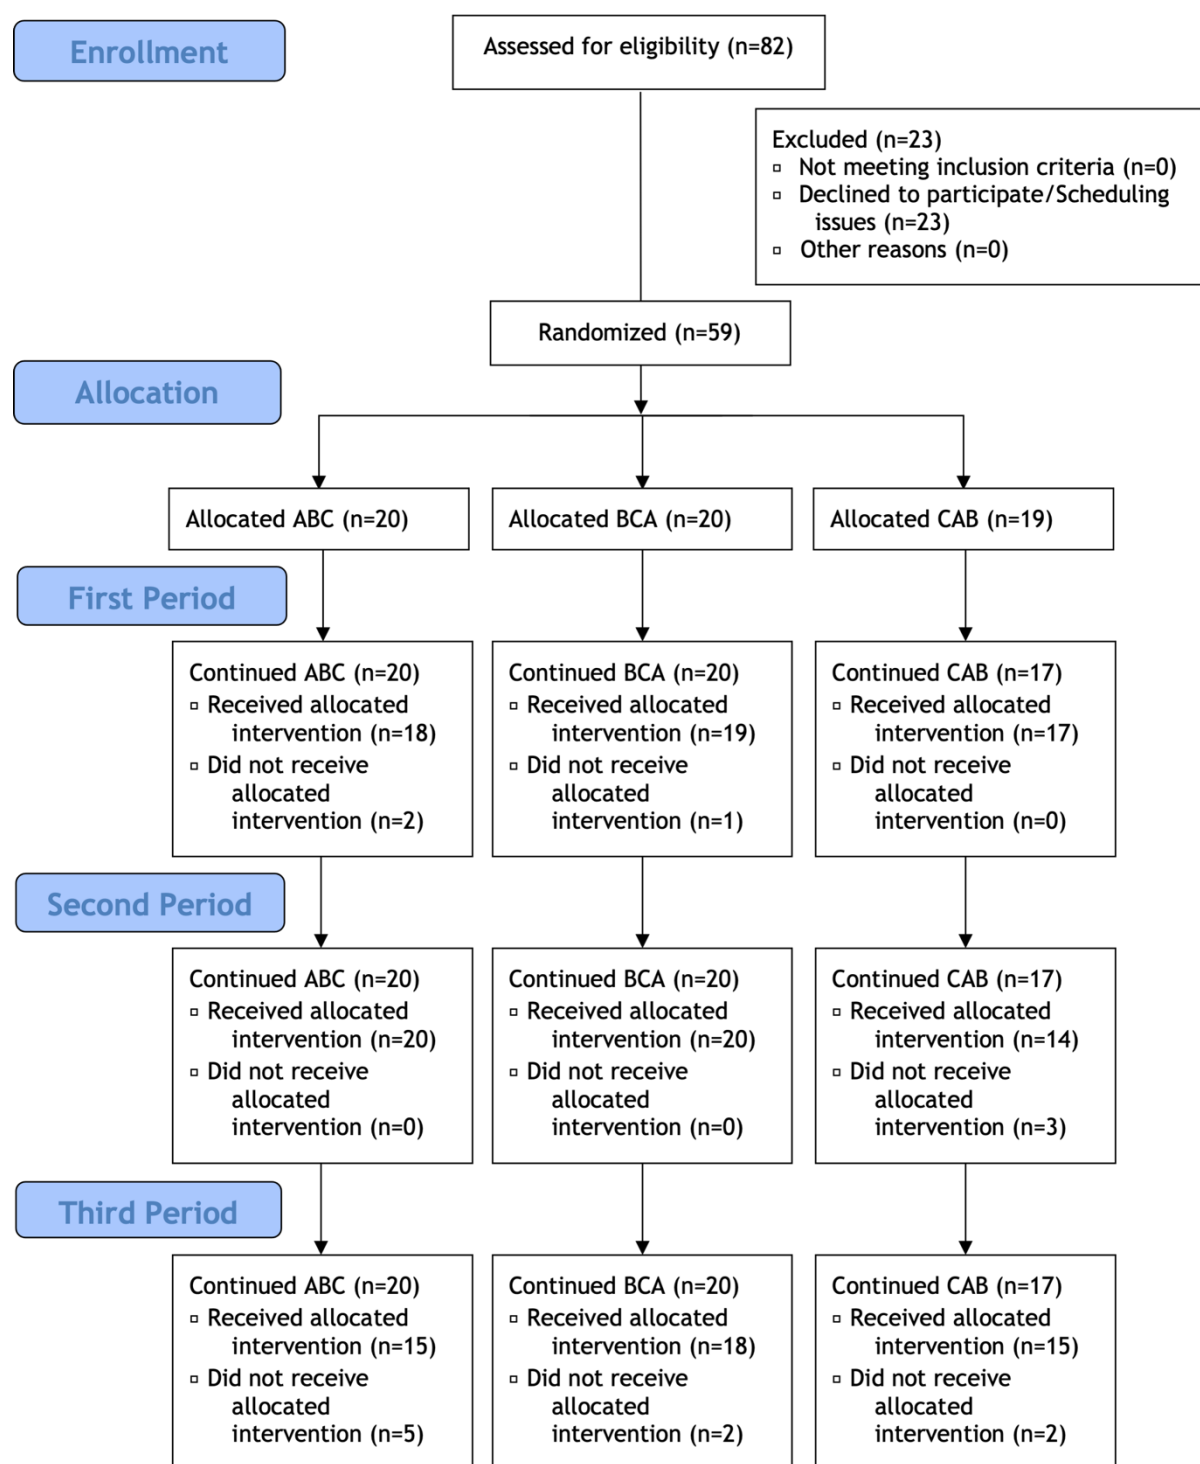

**Figure 3 | Participant flow chart; Legend: Not applicable.**

## **Recruitment:**

Participants were recruited, provided written informed consent, and reported baseline data in December 2019. The trial was implemented over the course of one month between January and February 2020.

## **Baseline data:**

Baseline demographics were recorded and included sex, handedness, age, and body mass index (BMI). The sample was predominantly female (68%), right-handed (91%), young ( $22.7 \pm 4.5$  years), and of normal weight ( $22.0 \pm 2.5$  BMI) (Table 4).

**Table 4 | Baseline demographics**

| Parameter | G1 (n=20)   |           | G2 (n=20)   |           | G3 (n=17)   |           |
|-----------|-------------|-----------|-------------|-----------|-------------|-----------|
|           | <i>R</i>    | %         | <i>R</i>    | %         | <i>R</i>    | %         |
| F:M       | 14:6        | 70        | 13:7        | 65        | 12:5        | 71        |
| RH:LH     | 16:4        | 80        | 19:1        | 95        | 17:0        | 100       |
|           | <i>Mean</i> | <i>SD</i> | <i>Mean</i> | <i>SD</i> | <i>Mean</i> | <i>SD</i> |
| Age       | 22.0        | 1.7       | 21.4        | 2.7       | 25.1        | 7.0       |
| BMI       | 21.8        | 1.7       | 21.3        | 2.1       | 23.2        | 3.4       |

Legend: F = female; M = male; RH = right-handed; LH = left-handed; R = ratio; SD = standard deviation.

## **Numbers analysed:**

The data were examined for availability and normality to rule out statistical errors during analysis. Overall, 8.9% of the collected data did not correspond to the confidence interval of the MyotonPRO (set to 90%) and was thus not available for analysis. All missing values arose from measurements of the CS, demonstrating that the data was not missing at random. The CS was consequently excluded from analysis because correct coefficient estimation was not guaranteed. After exclusion, data

## Osteopathy and Muscle Tone

416 from 104 treatments (54 for SM and 50 for UT) were included for analysis (104 of 156  
417 measures).

### 418 **Outcomes:**

419 Here, full outcome data are reported (**Table 5**). Subsequently, results will be  
420 presented (excluding the CS) according to the primary and secondary objectives.

424 Table 5 | Results - Outcomes

|     |    |      |      | F     | S       | D    | R     | C    | F     | S       | D    | R     | C    | F     | S       | D    | R     | C    |
|-----|----|------|------|-------|---------|------|-------|------|-------|---------|------|-------|------|-------|---------|------|-------|------|
| MRT | CS | pre  | mean | 31.24 | 1398.50 | 1.79 | 6.03  | 0.62 | 32.17 | 1565.75 | 1.72 | 5.70  | 0.60 | 32.09 | 1445.75 | 1.70 | 5.87  | 0.64 |
|     |    |      | SD   | 2.61  | 224.15  | 0.12 | 0.73  | 0.52 | 4.96  | 35.09   | 0.14 | 0.83  | 0.05 | 4.24  | 142.66  | 0.11 | 0.65  | 0.07 |
|     |    | post | mean | 32.73 | 1301.67 | 1.72 | 6.18  | 0.61 | 32.14 | 1352.83 | 1.74 | 6.07  | 0.61 | 33.35 | 1367.63 | 1.75 | 6.02  | 0.62 |
|     |    |      | SD   | 3.85  | 293.65  | 0.11 | 1.15  | 0.07 | 3.25  | 197.70  | 0.11 | 0.83  | 0.06 | 3.43  | 179.33  | 0.11 | 0.89  | 0.06 |
|     | SM | pre  | mean | 14.24 | 265.11  | 1.60 | 22.65 | 1.40 | 13.90 | 270.47  | 1.67 | 22.22 | 1.38 | 14.09 | 264.44  | 1.62 | 22.72 | 1.41 |
|     |    |      | SD   | 1.73  | 49.29   | 0.23 | 3.20  | 0.16 | 1.36  | 34.34   | 0.16 | 2.63  | 0.15 | 1.24  | 39.49   | 0.21 | 3.21  | 0.18 |
|     |    | post | mean | 14.08 | 262.78  | 1.59 | 22.96 | 1.41 | 13.79 | 257.40  | 1.62 | 22.97 | 1.42 | 13.97 | 260     | 1.59 | 23.01 | 1.43 |
|     |    |      | SD   | 1.49  | 47.98   | 0.26 | 2.55  | 0.13 | 0.97  | 32.10   | 0.19 | 2.76  | 0.16 | 1.23  | 34.67   | 0.18 | 3.06  | 0.18 |
|     | UT | pre  | mean | 12.11 | 193.53  | 1.16 | 26.48 | 1.56 | 11.72 | 167.73  | 0.99 | 27.44 | 1.56 | 11.68 | 171.06  | 1.01 | 27.52 | 1.56 |
|     |    |      | SD   | 0.97  | 30.18   | 0.25 | 2.60  | 0.15 | 0.64  | 20.28   | 0.12 | 2.39  | 0.19 | 0.93  | 33.65   | 0.18 | 1.93  | 0.10 |
|     |    | post | mean | 11.93 | 184.29  | 1.10 | 26.61 | 1.52 | 11.62 | 170.84  | 1.00 | 27.78 | 1.60 | 11.54 | 172.22  | 1.03 | 28.13 | 1.61 |
|     |    |      | SD   | 0.88  | 37.03   | 0.21 | 2.62  | 0.20 | 0.69  | 21.53   | 0.11 | 2.16  | 0.13 | 0.87  | 29.76   | 0.15 | 2.13  | 0.09 |
| MET | CS | pre  | mean | 33.37 | 1370.75 | 1.79 | 6.19  | 0.62 | 33.04 | 1376.33 | 1.82 | 6.28  | 0.62 | 31.56 | 1311    | 1.81 | 6.01  | 0.63 |
|     |    |      | SD   | 3.11  | 193.16  | 0.09 | 0.68  | 0.04 | 3.85  | 169.39  | 0.08 | 1.03  | 0.06 | 2.96  | 20.04   | 0.11 | 0.64  | 0.05 |
|     |    | post | mean | 32.81 | 1325.40 | 1.74 | 6.39  | 0.64 | 32.67 | 1378.13 | 1.83 | 6.15  | 0.63 | 33.05 | 1504.50 | 1.80 | 6.28  | 0.63 |
|     |    |      | SD   | 3.58  | 205.99  | 0.12 | 1.09  | 0.07 | 4.42  | 199.35  | 0.10 | 0.88  | 0.07 | 5.24  | 167.61  | 0.13 | 0.67  | 0.04 |
|     | SM | pre  | mean | 13.98 | 283.85  | 1.79 | 20.93 | 1.30 | 13.79 | 257.40  | 1.62 | 22.97 | 1.42 | 13.96 | 267.50  | 1.67 | 22.95 | 1.44 |
|     |    |      | SD   | 1.07  | 31.12   | 0.18 | 2.52  | 0.15 | 0.97  | 31.25   | 0.20 | 2.68  | 0.16 | 1.03  | 32.69   | 0.17 | 2.62  | 0.15 |
|     |    | post | mean | 13.95 | 283.15  | 1.75 | 21.19 | 1.32 | 11.75 | 252.35  | 1.61 | 23.86 | 1.48 | 14.13 | 270.71  | 1.65 | 22.52 | 1.40 |
|     |    |      | SD   | 1.12  | 33.46   | 0.15 | 2.48  | 0.15 | 1.03  | 37.04   | 0.20 | 2.88  | 0.17 | 1.23  | 32.04   | 0.21 | 2.47  | 0.15 |
|     | UT | pre  | mean | 11.71 | 170.45  | 1.01 | 27.41 | 1.55 | 11.51 | 171.95  | 1.03 | 28.09 | 1.60 | 11.84 | 182.21  | 1.08 | 27.45 | 1.60 |
|     |    |      | SD   | 0.83  | 26.19   | 0.11 | 1.92  | 0.12 | 0.89  | 28.44   | 0.15 | 2.36  | 0.14 | 0.89  | 23.43   | 0.21 | 2.62  | 0.14 |
|     |    | post | mean | 11.55 | 169.05  | 1.01 | 27.95 | 1.58 | 11.31 | 168.6   | 1.05 | 28.60 | 1.62 | 11.75 | 181.93  | 1.13 | 27.61 | 1.60 |
|     |    |      | SD   | 0.83  | 26.65   | 0.13 | 2.19  | 0.13 | 0.81  | 28.09   | 0.15 | 2.30  | 0.14 | 0.89  | 27.18   | 0.26 | 3.00  | 0.17 |
| STT | CS | pre  | mean | 33.29 | 1475.50 | 1.77 | 6.02  | 0.61 | 35.25 | 1472.25 | 1.81 | 5.54  | 0.60 | 33.77 | 1387.86 | 1.75 | 6.22  | 0.62 |
|     |    |      | SD   | 3.83  | 239.40  | 0.09 | 0.77  | 0.06 | 4.28  | 82.05   | 0.11 | 0.40  | 0.05 | 3.78  | 128.75  | 0.12 | 0.70  | 0.05 |
|     |    | post | mean | 33.61 | 1402.60 | 1.78 | 6.04  | 0.62 | 35.05 | 1428.50 | 1.77 | 5.84  | 0.61 | 34.39 | 1440.33 | 1.77 | 5.82  | 0.61 |
|     |    |      | SD   | 4.45  | 140.40  | 0.07 | 0.64  | 0.04 | 5.17  | 228.56  | 0.10 | 0.75  | 0.04 | 4.12  | 196.24  | 0.10 | 0.65  | 0.04 |
|     | SM | pre  | mean | 13.97 | 262.87  | 1.65 | 22.56 | 1.40 | 13.80 | 265.67  | 1.70 | 22.85 | 1.42 | 13.87 | 266.78  | 1.67 | 22.43 | 1.40 |
|     |    |      | SD   | 0.89  | 29.16   | 0.24 | 2.52  | 0.15 | 1.08  | 26.10   | 0.19 | 2.10  | 0.13 | 1.24  | 27.23   | 0.15 | 2.44  | 0.14 |
|     |    | post | mean | 13.88 | 259.13  | 1.62 | 22.87 | 1.42 | 13.78 | 254.2   | 1.64 | 22.99 | 1.42 | 13.72 | 261.39  | 1.63 | 22.99 | 1.44 |
|     |    |      | SD   | 0.90  | 31.03   | 0.23 | 2.77  | 0.16 | 1.23  | 30.57   | 0.22 | 2.42  | 0.13 | 1.11  | 27.31   | 0.15 | 2.47  | 0.14 |
|     | UT | pre  | mean | 11.49 | 176.53  | 1.04 | 28.39 | 1.64 | 11.81 | 188.2   | 1.10 | 27.40 | 1.62 | 11.66 | 174.00  | 1.02 | 27.85 | 1.61 |
|     |    |      | SD   | 0.97  | 26.21   | 0.15 | 3.27  | 0.20 | 0.53  | 21.09   | 0.23 | 1.53  | 0.09 | 0.83  | 17.21   | 0.11 | 2.02  | 0.14 |
|     |    | post | mean | 11.55 | 176.27  | 1.04 | 27.63 | 1.57 | 11.77 | 189.20  | 1.11 | 27.51 | 1.63 | 11.38 | 174.00  | 1.09 | 28.96 | 1.70 |
|     |    |      | SD   | 1.00  | 35.47   | 0.17 | 2.80  | 0.18 | 0.53  | 21.23   | 0.19 | 1.59  | 0.10 | 0.68  | 12.62   | 0.15 | 1.87  | 0.10 |

425 Legend: yellow = G1; blue = G2; green = G3; darker colouring = treated muscles (intervention values); lighter colouring = untreated muscles (control values). Abbreviations: MRT = myofascial  
426 release technique; MET = muscle energy technique; STT = soft tissue technique; CS = corrugator supercilii muscle; SM = superficial masseter muscle; UT = upper trapezius muscle; pre = before  
427 intervention; post = after intervention; SD = standard deviation; F = Oscillation Frequency; S = Dynamic Stiffness; D = Logarithmic Decrement; R = Mechanical Stress Relaxation Time; C = Ratio of  
428 deformation and Relaxation time.  
429

# *Outcomes for the primary objective:*

The outcomes for the primary objective were assessed by means of the standardized mean difference. The data passed all of Heidelberg's and Welch's convergence diagnoses and showed that: F (-0.163 [0.060]; p=0.008), S (-3.060 [1.563]; p=0.048), R (0.594 [0.141]; p<0.001), and C (0.038 [0.017]; p=0.028) changed significantly, while D (0.011 [0.017]; p=0.527) did not change significantly (Table 6). In other words, muscle tone (F [p=0.008]) and biomechanical properties (S [p=0.048] not D [p=0.527]) decreased, while the viscoelastic properties (R [p<0.001] and C [p=0.028]) increased. Subgroup analysis for sex-specific changes revealed a significant interaction for F (-0.192 [0.089]; p=0.030), but not for S (0.008 [0.0125]; p=0.510), D (0.008 [0.013]; p=0.555), R (-0.423 [0.218]; p=0.057), and C (-0.019 [0.015]; p=0.237) (Table 6).

**Table 6 | Results - Outcomes for the primary objective**

| Parameter | Gender | Mean   | SD    | Quantile |        | p-value  |
|-----------|--------|--------|-------|----------|--------|----------|
|           |        |        |       | 0.025    | 0.075  |          |
| F         | total  | -0.163 | 0.060 | -0.278   | -0.045 | 0.008 *  |
|           | female | -0.209 | 0.073 | -0.344   | -0.059 | 0.003 *  |
|           | male   | -0.106 | 0.116 | -0.335   | 0.120  | 0.345    |
| S         | total  | -3.060 | 1.563 | -6.187   | -0.011 | 0.048 *  |
|           | female | -4.152 | 1.831 | -7.707   | -0.540 | 0.023 *  |
|           | male   | -1.305 | 2.829 | -6.747   | 4.310  | 0.628    |
| D         | total  | 0.011  | 0.017 | -0.022   | 0.045  | 0.527    |
|           | female | 0.018  | 0.012 | -0.006   | 0.040  | 0.120    |
|           | male   | -0.001 | 0.013 | -0.026   | 0.024  | 0.906    |
| R         | total  | 0.594  | 0.141 | 0.311    | 0.873  | <0.001 * |
|           | female | 0.678  | 0.182 | 0.321    | 1.044  | <0.001 * |
|           | male   | 0.471  | 0.256 | -0.041   | 0.983  | 0.074    |
| C         | total  | 0.038  | 0.017 | 0.004    | 0.071  | 0.028 *  |

## Osteopathy and Muscle Tone

female 0.045 0.013 0.020 0.071 <0.001 \*

male 0.029 0.015 -0.001 0.059 0.059

Legend: F = Oscillation Frequency; S = Dynamic Stiffness; D = Logarithmic Decrement; R = Mechanical Stress Relaxation Time; C = Ratio of deformation and Relaxation time; SD = standard deviation; \* = p<0.05.

### Outcomes for the secondary objective:

Since there was a significant interaction between treatment and muscle (0.037 [0.014]; p=0.009), the simple effects were interpreted for the secondary objective. There was a tendency for a difference in comparison between MRI, MET and STT, but all multiple comparisons between treatment and muscle were not significant (p>0.05) (Table 7). There was no sex-specific simple effect for the significant interaction but some tendency (p>0.05). For example, in males compared to females, F of the UT showed a higher increase and decrease following MET and MRT, respectively (Table 8) (Figure 4) (Figure 5).

Table 7 | Results - Outcome for the secondary objective

| Parameter | Muscle | Treatment | Simple effect | SD    | Quantile 0.025 | Quantile 0.975 | p-value |
|-----------|--------|-----------|---------------|-------|----------------|----------------|---------|
| F         | SM     | MET       | -0.084        | 0.121 | -0.320         | 0.147          | 0.498   |
|           |        | MRT       | -0.061        | 0.120 | -0.307         | 0.171          | 0.598   |
|           |        | STT       | 0.146         | 0.126 | -0.100         | 0.395          | 0.244   |
|           | UT     | MET       | 0.073         | 0.132 | -0.189         | 0.325          | 0.577   |
|           |        | MRT       | 0.046         | 0.124 | -0.199         | 0.293          | 0.695   |
|           |        | STT       | -0.120        | 0.124 | -0.372         | 0.117          | 0.324   |
| S         | SM     | MET       | 1.359         | 2.916 | -4.366         | 6.992          | 0.641   |
|           |        | MRT       | 3.633         | 2.872 | -1.979         | 9.215          | 0.202   |
|           |        | STT       | -4.992        | 3.127 | -11.151        | 1.225          | 0.111   |
|           | UT     | MET       | -0.578        | 3.248 | -6.974         | 5.739          | 0.851   |
|           |        | MRT       | 0.921         | 2.984 | -4.995         | 6.868          | 0.758   |
|           |        | STT       | -0.343        | 3.057 | -6.367         | 5.716          | 0.915   |
| D         | SM     | MET       | 0.016         | 0.031 | -0.044         | 0.076          | 0.620   |
|           |        | MRT       | 0.019         | 0.031 | -0.042         | 0.081          | 0.521   |
|           |        | STT       | -0.036        | 0.033 | -0.102         | 0.029          | 0.281   |
|           | UT     | MET       | -0.002        | 0.034 | -0.070         | 0.065          | 0.934   |
|           |        | MRT       | -0.018        | 0.033 | -0.086         | 0.046          | 0.573   |
|           |        | STT       | 0.021         | 0.033 | -0.045         | 0.086          | 0.530   |
|           |        | MET       | 0.329         | 0.268 | -0.188         | 0.859          | 0.216   |

## Osteopathy and Muscle Tone

|   |    |     |        |       |        |       |       |
|---|----|-----|--------|-------|--------|-------|-------|
| R | SM | MRT | 0.081  | 0.275 | -0.447 | 0.609 | 0.777 |
|   |    | STT | -0.411 | 0.288 | -0.984 | 0.157 | 0.156 |
|   | UT | MET | -0.468 | 0.303 | -1.079 | 0.124 | 0.115 |
|   |    | MRT | -0.016 | 0.294 | -0.592 | 0.575 | 0.960 |
|   |    | STT | 0.485  | 0.282 | -0.067 | 1.026 | 0.086 |
| C | SM | MET | 0.021  | 0.031 | -0.029 | 0.073 | 0.432 |
|   |    | MRT | 0.019  | 0.032 | -0.030 | 0.064 | 0.483 |
|   |    | STT | -0.041 | 0.041 | -0.087 | 0.518 | 0.224 |
|   | UT | MET | -0.028 | 0.022 | -0.076 | 0.026 | 0.395 |
|   |    | MRT | -0.020 | 0.019 | -0.072 | 0.032 | 0.428 |
|   |    | STT | 0.049  | 0.028 | -0.002 | 0.099 | 0.197 |

**Legend:** F = Oscillation Frequency; S = Dynamic Stiffness; D = Logarithmic Decrement; R = Mechanical Stress Relaxation Time; C = Ratio of deformation and Relaxation time; SM = superficial masseter muscle; UT = upper trapezius muscle; SD = standard deviation.

**Table 8 | Sex-specific analysis of frequency**

| Gender | Muscle | Treatment | Mean   | Quantile | Quantile | p-value |
|--------|--------|-----------|--------|----------|----------|---------|
|        |        |           |        | 0.025    | 0.075    |         |
| female | SM     | MET       | -0.203 | -0.526   | 0.117    | 0.999   |
|        |        | MRT       | -0.417 | -0.771   | -0.064   | 0.189   |
|        |        | STT       | -0.083 | -0.463   | 0.284    | 0.506   |
|        | UT     | MET       | -0.259 | -0.675   | 0.149    | 0.443   |
|        |        | MRT       | 0.025  | -0.315   | 0.365    | 0.177   |
|        |        | STT       | -0.274 | -0.620   | 0.069    | 0.637   |
| male   | SM     | MET       | -0.369 | -0.915   | 0.168    | 0.276   |
|        |        | MRT       | 0.101  | -0.404   | 0.604    | 0.199   |
|        |        | STT       | 0.107  | -0.525   | 0.723    | 0.411   |
|        | UT     | MET       | 0.222  | -0.371   | 0.798    | 0.195   |
|        |        | MRT       | -0.400 | -0.932   | 0.131    | 0.199   |
|        |        | STT       | -0.296 | -0.826   | 0.248    | 0.407   |

**Legend:** SM = superficial masseter muscle; UT = upper trapezius muscle; SD = standard deviation. P-value for the simple effects.



## Osteopathy and Muscle Tone

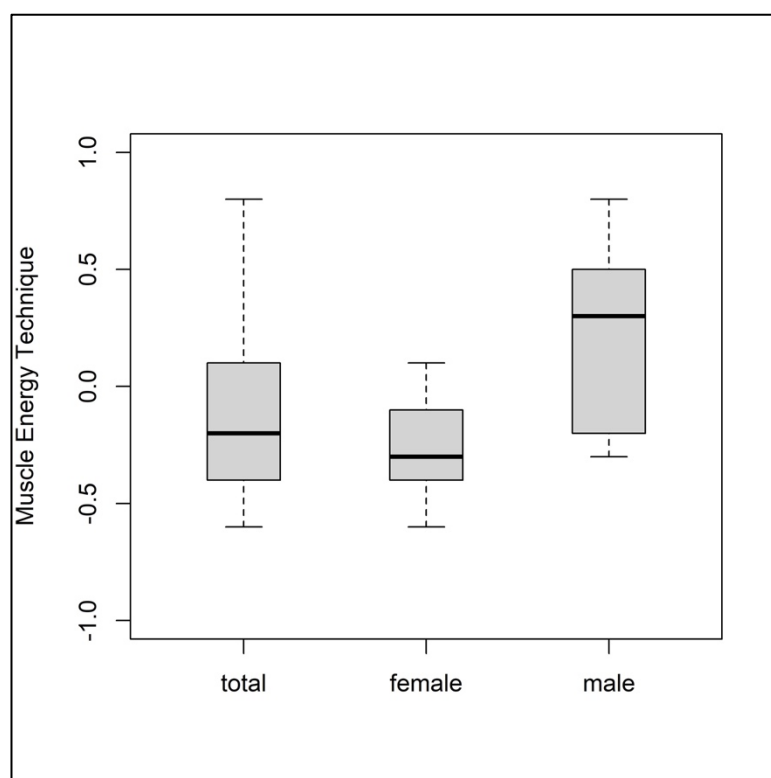

**Figure 4** | Mean differences in frequency of UT for MET; **Legend:** Not applicable.

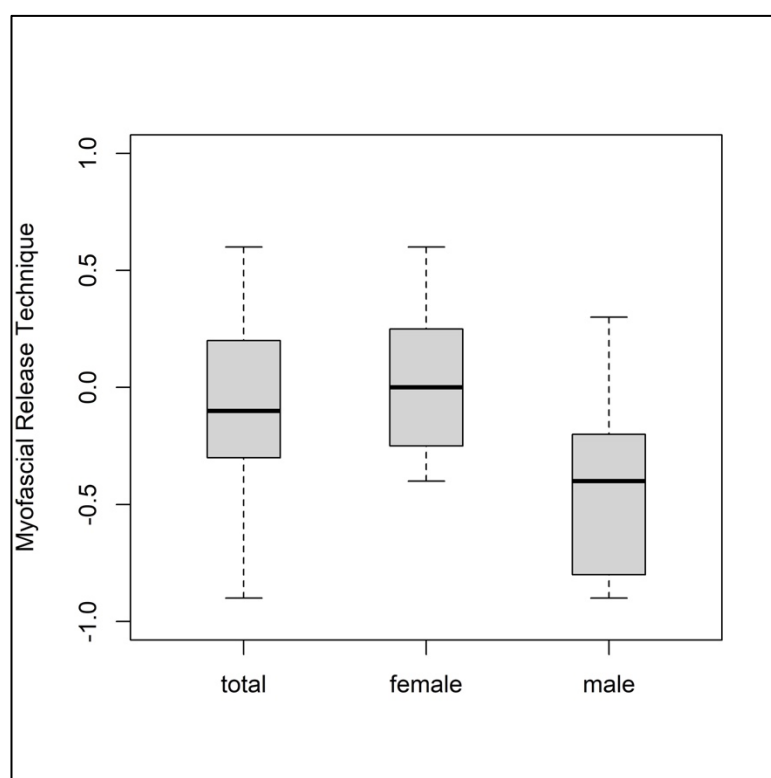

**Figure 5** | Mean differences in frequency of UT for MRT; **Legend:** Not applicable.

## Harms:

Participants were instructed to report harms to their physical or mental health to the principal investigator by phone or e-mail, pending their severity. No harms were reported.

## DISCUSSION

### Findings:

To the best of our knowledge, this study is the first to investigate the immediate effect of OMT on the HRMT of healthy subjects. In detail, we used biomechanical and viscoelastic measures to assess the effect of manual techniques with different modalities on muscles with different characteristics. The sample comprised 57 participants (computed: 60; screened: 82; randomised 59) and showed acceptable recruitment and retention rates (72% and 96%, respectively). First, we report significant results for the primary objective (main effect). In detail, MET, MRT, and STT applied to the SM and UT (CS was excluded) resulted in significantly decreased muscle tone ( $F$  [ $p=0.008$ ]), decreased biomechanical ( $S$  [ $p=0.048$ ] not  $D$  [ $p=0.527$ ]), and increased viscoelastic properties ( $R$  [ $p<0.001$ ] and  $C$  [ $p=0.028$ ]) from baseline to follow-up (compared to the same, but untreated, muscles of subjects from other groups) (**Table 6**). Notably, decrement ( $D$  [ $p=0.527$ ]) did not change significantly, however, this muscle parameter was previously proposed to be a constant [130]. The data suggest that the primary hypothesis can be confirmed, showing that osteopathic techniques modulated the HRMT of treated muscles in healthy subjects by decreasing muscle tone and stiffness while increasing relaxation and creep (decrement did not change significantly). Second, we demonstrate no significant results for the secondary objective (interaction effect). However, we detected a

## Osteopathy and Muscle Tone

non-significant trend ( $p > 0.05$ ) suggesting that the decrease in muscle tone (F), decrease in biomechanical (D not S), and increase in viscoelastic properties (R and C) were achieved through MET and MRT (not STT) when applied to the SM, and through STT (not MET and MRT) when applied to the UT (**Table 7**). Notably, this tendency was consistent for all muscle properties except for muscle stiffness (S). In other words, the smaller and thinner muscle (SM) responded (as expected) to the active (MET) and low-pressure technique (MRT), whereas the larger and thicker muscle (UT) responded (as expected) to the high-pressure technique (STT). The reported trend is fairly consistent with the secondary hypothesis (considering that the CS was excluded) but requires further scrutiny for verification or falsification. Lastly, subgroup analysis for the main effect revealed a significant sex-specific difference for muscle tone ( $p = 0.030$ ) but no other muscle properties ( $p > 0.05$ ). Overall, female subjects showed greater descriptive changes (mean values for primary objective) in all muscle properties than male subjects (**Table 6**). For the interaction effect, no significant sex-specific difference was found but an interesting tendency showed that the muscle tone of the UT increased after MET and decreased after MRT in males, whereas the opposite was reported for females (**Table 8**) (**Figure 4**) (**Figure 5**). The reason for this trend is unclear but we hypothesise, based on clinical experience, that males tend to exaggerate the counterpressure during MET techniques (presumably to demonstrate strength) which may have increased muscle tone.

### Mechanisms:

To date, the mechanisms underlying these reported changes in HRMT following OMT are unclear and require further investigation. There might be biological, psychological, and social factors involved. However, based on the context of this

## Osteopathy and Muscle Tone

study (comprising a short treatment time, strong manual focus, and unsound therapeutic alliance), we speculate that a biological mechanism of action is most probable. Though it might be the case that the three techniques have the same, different, overlapping, or multiple mechanisms of action (**Box 2**), we suggest that mechanotransduction may underlie these changes. In detail, mechanotransduction suggests that extracellular mechanical signals are converted into intracellular chemical signals (and changes in gene expression) via integrins, which physically couple the extracellular matrix (including collagen fibres) with the intracellular cytoskeleton (including actomyosin filaments) [131]. As the HRMT depends on the interaction of cellular actomyosin filaments [79], we hypothesise that mechanical stimuli provided within osteopathic treatment may change the tensional forces within the (collagen fibres of the) extracellular matrix and, through integrins, within the (actomyosin filaments of the) intracellular cytoskeleton, thereby modifying the HRMT.

### Comparison:

Overall, there is a scarcity of studies assessing the effect of manual treatment on muscle properties. Moreover, the available literature is focused on muscle stiffness and tone, whereas decrement, relaxation, and creep are mostly not considered. Therefore, our findings complement the existing body of evidence. Taking these factors into account, our results are largely consistent with the current literature. For example, in healthy participants, it was shown that manual therapy can reduce muscle stiffness [132]; this was demonstrated for MET [133], MRT (or self-MRT, respectively, which mimics manual MRT with a foam roller) [134], and STT (or massage, respectively, which resembles STT using deep pressure gliding strokes) [135]. Similarly, it was revealed that trigger points have an increased muscle tone

## Osteopathy and Muscle Tone

and stiffness [113], which can be decreased through manual myofascial release [136]. Notably, manual techniques might also reduce muscle tone and stiffness in participants with MSDs [137]. Particularly in patients with LBP, increased paravertebral muscle tone and stiffness were demonstrated [138], which could be reduced through manual techniques like spinal mobilisation [139]. However, further research is required to substantiate these findings. Beyond that, we need to consider other factors that could have swayed the results, such as gender, age, and handedness. The sample in this study was relatively homogenous comprising predominantly female (68%), young ( $22.7 \pm 4.5$  years), and right-handed (91%) subjects. In general, muscle tone and stiffness are reported to be greater in males than females [140-142], however, there are also conflicting findings [105]. Nonetheless, higher muscle tone and stiffness in males may arise due to differences in the composition of muscle fiber types between the genders [143] as well as physiological varieties in muscle size, mass, and conditioning [130]. Besides gender, significant differences in muscle stiffness have also been reported between age groups (higher in elderly and middle-aged than young individuals) [142] and handedness (higher on the side of the dominant hand) [141]. Although subgroup analysis was performed for gender, we did not consider the impact of age (because only two subjects were over thirty years old) and handedness (because all measures were taken on the right side and only five subjects were left-handed).

### **Limitations:**

There are limitations to consider when interpreting the results of this study. First and foremost, one of the three conditions was dropped because of frequent measurement errors. In detail, all missing values (8.9% of all numbers analysed) originated from myotonometer measurements of the CS (not SM or UT), which was

consequently excluded from the analysis. These dependent missing values limited the number of observations available to analysis and therefore reduced the statistical power [144]. Further, dropping one condition increases the likelihood of reporting false-positive results [145]. Presumably, these missing values arose because the feasibility of the MyotonPRO is limited to measurements of muscles that are thicker than 3mm [111] and not located near the bone [146, 147] (Box 6).

#### Box 6 | CS characteristics

Prior to the trial, we reviewed the literature on the thickness of the CS, which was reported with a mean maximum thickness of  $5.50 \pm 0.91$  mm in healthy subjects [94]. However, because the measurements of the CS were frequently inconsistent, we reviewed the literature again and found other studies accounting for an average thickness of approximately  $1.62 \pm 0.4$  mm [97], 2-3 mm [148], and ~2.4-2.8 mm [149], respectively. Thus, we acknowledge a flaw in our initial literature search and suggest that the CS may be too thin and/or near the bone to be consistently measured using the MyotonPRO.

Another shortfall is that the results are merely informative of an immediate-term effect (approximately five minutes after treatment). Thus, the measured tissue response may be reflective of the thixotropy effect [150]; albeit the size of this effect remains unclear [151]. Further, it is noteworthy that participants were assessed in supine position although the HRMT relates to the biotensegrity system and posture [79]. Other barriers to interpreting the results relate to the interventions. For one, manual techniques are often loosely defined, and it was particularly difficult to find literature describing the same manual procedure as the STT used in this study. In the end, we settled to include research on massage techniques, which employ similar parameters than the STT. Future research might consider not examining manual techniques (e.g., MET, MRT, and STT) but rather their biophysical parameters (e.g., stretch, compression, shear, and torque forces) to ensure optimal comparability [152, 153]. Furthermore, the manual techniques

## Osteopathy and Muscle Tone

were applied for five minutes, which appears brief but seems to be sufficient for one muscle to be treated with one technique (because the therapists perceived palpatory signs of release/relaxation). Also, we cannot rule out therapist-specific differences in outcomes, although consensus training was implemented. Moreover, the interventions encompassed common manual techniques with different characteristics, however, single manual techniques are not representative of person-centered osteopathic care.

### **Future directions:**

Future studies might assess the effect of OMT on the HRMT of people with MSDs because conditions like LBP and NP are associated with altered muscle properties [116, 138, 154]. For example, in patients with LBP compared to healthy controls, the lumbar extensor myofascia generally shows increased muscle tone (F), stiffness (S), and decrement (D) [141, 154-156] as well as decreased relaxation (R) and creep (C) [138, 157, 158]. Hence, we propose to examine the effect of OMT on the muscle properties of, for example, the lumbar extensor myofascia or the upper trapezius muscles in patients with LBP or NP, respectively. Based on the present findings, we hypothesise that osteopathic interventions will decrease muscle tone, stiffness, and decrement, and increase relaxation and creep in this population. However, future studies are needed to validate or falsify this hypothesis. Another consideration for future research is that muscle properties like stiffness do not seem to correlate with pain (in patients with chronic NP and LBP), because muscle stiffness typically returns to baseline one day after treatment (using cupping massage) even if the pain improves [159]. Lastly, it is unclear if OMT could also have the opposite effect. In detail, it has previously been assumed that OMT restores normal muscle tone where it is altered [73-76], meaning that high muscle tone decreases, and low muscle tone

## Osteopathy and Muscle Tone

increases, when OMT is applied [83]. Therefore, it might be useful to assess the effect of OMT on conditions associated with both hypertonia and hypotonia. Lastly, future research should assess if these changes are enduring in the short, medium, and long term.

### **Interpretation:**

In this study, we demonstrate that OMT modifies the HRMT in healthy participants without significant interaction of muscle-technique pairs. The mechanisms underlying these changes are unclear and the results are limited by the exclusion of one condition. Our findings are largely consistent with previous research but merely informative of an immediate effect. Future studies should modify the protocol and assess if these effects are reproducible (and beneficial) in patients with MSDs. In the end, although speculative, we hypothesise that modifying the HRMT may be a mechanism of action underlying manual techniques.

## **CONCLUSION**

Taken together, we built on research suggesting that alterations of the HRMT may underlie MSDs and respond to OMT. Taken together, we report that osteopathic techniques (MRT, MET, and STT) significantly decreased muscle tone (F), decreased biomechanical (S not D), and increased viscoelastic properties (R and C) of the SM and UT (CS was not measurable) at immediate term. Hence, osteopathic modalities seem to modify the HRMT in healthy subjects, generating changes likely associated with health benefits (decreasing muscle tone and stiffness while increasing viscoelasticity). However, it is unclear if some muscle-technique pairs change the HRMT more effectively than others (e.g., techniques using high pressure applied to thicker, rather than thinner, muscles) and future studies are required to answer this



## Osteopathy and Muscle Tone

647 inquiry. More importantly, these findings may inform future research assessing the  
648 effect of OMT on the HRMT in patients with MSDs.

## REFERENCES

1. Safiri S, Kolahi AA, Cross M, Hill C, Smith E, Carson-Chahhoud K, et al. Prevalence, Deaths, and Disability-Adjusted Life Years Due to Musculoskeletal Disorders for 195 Countries and Territories 1990-2017. *Arthritis Rheumatol.* 2021;73:702-14. doi:10.1002/art.41571.
2. Safiri S, Kolahi AA, Cross M, Carson-Chahhoud K, Almasi-Hashiani A, Kaufman J, et al. Global, regional, and national burden of other musculoskeletal disorders 1990-2017: results from the Global Burden of Disease Study 2017. *Rheumatology.* 2021;60:855-865. doi:10.1093/rheumatology/keaa315.
3. Jin Z, Wang D, Zhang H, Liang J, Feng X, Zhao J, et al. Incidence trend of five common musculoskeletal disorders from 1990 to 2017 at the global, regional and national level: Results from the global burden of disease study 2017. *Ann Rheum Dis.* 2020;79:1014-22. doi:10.1136/annrheumdis-2020-217050.
4. GBD 2017 Disease and Injury Incidence and Prevalence Collaborators. Global, regional, and national incidence, prevalence, and years lived with disability for 354 Diseases and Injuries for 195 countries and territories, 1990-2017: A systematic analysis for the Global Burden of Disease Study 2017. *Lancet.* 2018;392:1789-858. doi:10.1016/S0140-6736(18)32279-7.
5. Bornhöft L, Thorn J, Svensson M, Nordeman L, Eggertsen R, Larsson MEH. More cost-effective management of patients with musculoskeletal disorders in primary care after direct triaging to physiotherapists for initial assessment compared to initial general practitioner assessment. *BMC Musculoskelet Disord.* 2019;20:1-9. doi:10.1186/s12891-019-2553-9.
6. GBD 2019 Viewpoint Collaborators. Five insights from the Global Burden of Disease Study 2019. *Lancet.* 2020;396:1135-59. doi:10.1016/S0140-6736(20)31404-5.
7. Blyth FM, Briggs AM, Huckel Schneider C, Hoy DG, March LM. The global burden of musculoskeletal pain - where to from here? *Am J Public Health.* 2019;109:35-40. doi:10.2105/AJPH.2018.304747.
8. Lin I, Wiles L, Waller R, Goucke R, Nagree Y, Gibberd M, et al. What does best practice care for musculoskeletal pain look like? Eleven consistent recommendations from high-quality clinical practice guidelines: Systematic review. *Br J Sports Med.* 2020;54:79-86. doi:10.1136/bjsports-2018-099878.
9. Babatunde OO, Jordan JL, Van Der Windt DA, Hill JC, Foster NE, Protheroe J. Effective treatment options for musculoskeletal pain in primary care: A systematic overview of current evidence. *PLoS One.* 2017;12:e0178621. doi:10.1371/journal.pone.0178621.

## Osteopathy and Muscle Tone

- 681 10. Kløjgaard ME, Manniche C, Pedersen LB, Bech M, Søgaard R. Patient preferences for treatment  
682 of low back pain - A discrete choice experiment. Value Heal. 2014;17:390-6.  
683 doi:10.1016/j.jval.2014.01.005.
- 684 11. Goertz CM, George SZ. Insurer Coverage of Nonpharmacological Treatments for Low Back Pain -  
685 Time for a Change. JAMA Netw Open. 2018;1:e183037.
- 686 12. Gianola S, Barger S, Del Castillo G, Corbetta D, Turolla A, Andreano A, et al. Effectiveness of  
687 treatments for acute and subacute mechanical non-specific low back pain: a systematic review with  
688 network meta-analysis. Br J Sports Med. 2022;56:41-50. doi:10.1136/bjsports-2020-103596.
- 689 13. Vaucher P, Macdonald RJD, Carnes D. The role of osteopathy in the Swiss primary health care  
690 system: A practice review. BMJ Open. 2018;8:e023770. doi:10.1136/bmjopen-2018-023770.
- 691 14. Tyreman S. Evidence, alternative facts and narrative: A personal reflection on person-centred  
692 care and the role of stories in healthcare. Int J Osteopath Med. 2018;28:1-3.  
693 doi:10.1016/j.ijosm.2018.04.005.
- 694 15. Fahlgren E, Nima AA, Archer T, Garcia D. Person-centered osteopathic practice: Patients'  
695 personality (body, mind, and soul) and health (ill-being and well-being). PeerJ. 2015;3:e1349.  
696 doi:10.7717/peerj.1349.
- 697 16. Grace S, Orrock P, Vaughan B, Blaich R, Coutts R. Understanding clinical reasoning in  
698 osteopathy: A qualitative research approach. Chiropr Man Ther. 2016;24:1-10. doi:10.1186/s12998-  
699 016-0087-x.
- 700 17. Lucas N. Psychosocial factors in osteopathic practice: To what extent should they be assessed?  
701 Int J Osteopath Med. 2005;8:49-59. doi:10.1016/j.ijosm.2005.04.002.
- 702 18. Saracutu M, Rance J, Davies H, Edwards DJ. The effects of osteopathic treatment on  
703 psychosocial factors in people with persistent pain: A systematic review. Int J Osteopath Med.  
704 2018;27:23-33. doi:10.1016/j.ijosm.2017.10.005.
- 705 19. Adams J, Sibbritt D, Steel A, Peng W. A workforce survey of Australian osteopathy: Analysis of a  
706 nationally-representative sample of osteopaths from the Osteopathy Research and Innovation  
707 Network (ORION) project. BMC Health Serv Res. 2018;18:1-7. doi:10.1186/s12913-018-3158-y.
- 708 20. Steel A, Peng W, Sibbritt D, Adams J. Introducing national osteopathy practice-based research  
709 networks in Australia and New Zealand: an overview to inform future osteopathic research. Sci Rep.  
710 2020;10:1-11. doi:10.1038/s41598-020-57918-7.
- 711 21. Sciomachen P, Arienti C, Bergna A, Castagna C, Consorti G, Lotti A, et al. Core competencies in  
712 osteopathy: Italian register of osteopaths proposal. Int J Osteopath Med. 2018;27:1-5.

## Osteopathy and Muscle Tone

- doi:10.1016/j.ijosm.2018.02.001.
22. Kuchera ML. Applying osteopathic principles to formulate treatment for patients with chronic pain. *J Am Osteopath Assoc.* 2007;107:28-38.
23. Alvarez G, Roura S, Cerritelli F, Esteves JE, Verbeeck J, van Dun PLS. The Spanish Osteopathic Practitioners Estimates and Rates (OPERA) study: A cross-sectional survey. *PLoS One.* 2020;15:e0234713. doi:10.1371/journal.pone.0234713.
24. Smith D. Reflecting on new models for osteopathy - it's time for change. *Int J Osteopath Med.* 2019;31:15-20. doi:10.1016/j.ijosm.2018.10.001.
25. Sposato NS, Bjerså K. Osteopathic Manipulative Treatment in Surgical Care: Short Review of Research Publications in Osteopathic Journals During the Period 1990 to 2017. *J Evidence-Based Integr Med.* 2018;23:1-8. doi:10.1177/2515690X18767671.
26. Pincus T, Woodcock A, Vogel S. Returning back pain patients to work: How private musculoskeletal practitioners outside the national health service perceive their role (an interview study). *J Occup Rehabil.* 2010;20:322-30. doi:10.1007/s10926-009-9217-9.
27. Rehman Y, Ferguson H, Bozek A, Blair J, Allison A, Johnston R. Osteopathic manual treatment for pain severity, functional improvement, and return to work in patients with chronic pain. *J Am Osteopath Assoc.* 2020;120:888-906. doi:10.7556/jaoa.2020.128.
28. Bohlen L, Shaw R, Cerritelli F, Esteves JE. Osteopathy and Mental Health: An Embodied, Predictive, and Interoceptive Framework. *Front Psychol.* 2021;12:1-22. doi:10.3389/fpsyg.2021.767005.
29. Lunghi C, Consorti G, Tramontano M, Esteves JE, Cerritelli F. Perspectives on tissue adaptation related to allostatic load: Scoping review and integrative hypothesis with a focus on osteopathic palpation. *J Bodyw Mov Ther.* 2020;24:212-20. doi:10.1016/j.jbmt.2020.03.006.
30. Tamburella F, Piras F, Piras F, Spanò B, Tramontano M, Gili T. Cerebral perfusion changes after osteopathic manipulative treatment: A randomized manual placebo-controlled trial. *Front Physiol.* 2019;10:1-10. doi:10.3389/fphys.2019.00403.
31. Task Force on the Low Back Pain Clinical Practice Guidelines. American Osteopathic Association guidelines for osteopathic manipulative treatment (OMT) for patients with low back pain. *J Am Osteopath Assoc.* 2016;116:536-49. doi:10.7556/jaoa.2016.107.
32. Giusti R. Glossary of Osteopathic Terminology. 3rd edition. American Association of Colleges of Osteopathic Medicine; 2017. <https://www.aacom.org/docs/default-source/insideome/got2011ed.pdf>.

## Osteopathy and Muscle Tone

33. Ajimsha MS, Al-Mudahka NR, Al-Madzhaz JA. Effectiveness of myofascial release: Systematic review of randomized controlled trials. *J Bodyw Mov Ther.* 2015;19:102-12. doi:10.1016/j.jbmt.2014.06.001.
34. McKenney K, Elder AS, Elder C, Hutchins A. Myofascial release as a treatment for orthopaedic conditions: A systematic review. *J Athl Train.* 2013;48:522-7. doi:10.4085/1062-6050-48.3.17.
35. Beardsley C, Škarabot J. Effects of self-myofascial release: A systematic review. *J Bodyw Mov Ther.* 2015;19:747-58. doi:10.1016/j.jbmt.2015.08.007.
36. Krause F, Wilke J, Niederer D, Vogt L, Banzer W. Acute effects of foam rolling on passive tissue stiffness and fascial sliding: Study protocol for a randomized controlled trial. *Trials.* 2017;18:1-6.
37. Zein-Hammoud M, Standley PR. Modeled osteopathic manipulative treatments: A review of their in vitro effects on fibroblast tissue preparations. *J Am Osteopath Assoc.* 2015;115:490-502. doi:10.7556/jaoa.2015.103.
38. Laimi K, Mäkilä A, Bärlund E, Katajapuu N, Oksanen A, Seikkula V, et al. Effectiveness of myofascial release in treatment of chronic musculoskeletal pain: a systematic review. *Clin Rehabil.* 2018;32:440-50. doi:10.1177/0269215517732820.
39. Wu Z, Wang Y, Ye X, Chen Z, Zhou R, Ye Z, et al. Myofascial Release for Chronic Low Back Pain: A Systematic Review and Meta-Analysis. *Front Med.* 2021;8:1-14. doi:10.3389/fmed.2021.697986.
40. Chen Z, Wu J, Wang X, Wu J, Ren Z. The effects of myofascial release technique for patients with low back pain: A systematic review and meta-analysis. *Complement Ther Med.* 2021;59:102737. doi:10.1016/j.ctim.2021.102737.
41. Franke H, Fryer G, Ostelo RWJG, Kamper SJ. Muscle energy technique for non-specific low-back pain. A Cochrane systematic review. *Int J Osteopath Med.* 2016;20:41-52. doi:10.1016/j.ijosm.2016.01.002.
42. Fryer G. Muscle energy technique: An evidence-informed approach. *Int J Osteopath Med.* 2011;14:3-9. doi:10.1016/j.ijosm.2010.04.004.
43. Thomas E, Cavallaro AR, Mani D, Bianco A, Palma A. The efficacy of muscle energy techniques in symptomatic and asymptomatic subjects: A systematic review. *Chiropr Man Ther.* 2019;27:1-18. doi:10.1186/s12998-019-0258-7.
44. Koren Y, Kalichman L. Deep tissue massage: What are we talking about? *J Bodyw Mov Ther.* 2018;22:247-51. doi:10.1016/j.jbmt.2017.05.006.
45. El-Hafez HM, Hamdy HA, Takla MK, Ahmed SEB, Genedy AF, Abd EL-Azeim ASS. Instrument-assisted soft tissue mobilisation versus stripping massage for upper trapezius myofascial trigger

## Osteopathy and Muscle Tone

- 777 points. J Taibah Univ Med Sci. 2020;15:87-93. doi:10.1016/j.jtumed.2020.01.006.
- 778 46. Bell J. Massage therapy helps to increase range of motion, decrease pain and assist in healing a  
779 client with low back pain and sciatica symptoms. J Bodyw Mov Ther. 2008;12:281-9.  
780 doi:10.1016/j.jbmt.2008.01.006.
- 781 47. Waters-Banker C, Dupont-Versteegden EE, Kitzman PH, Butterfield TA. Investigating the  
782 mechanisms of massage efficacy: The role of mechanical immunomodulation. J Athl Train.  
783 2014;49:266-73. doi:10.4085/1062-6050-49.2.25.
- 784 48. Loghmani MT, Whitted M. Soft Tissue Manipulation: A Powerful Form of Mechanotherapy. J  
785 Physiother Phys Rehabil. 2016;1:1-6. doi:10.4172/2573-0312.1000122.
- 786 49. Weerapong P, Hume PA, Kolt GS. The Mechanisms of Massage and Effects on Performance,  
787 Muscle Recovery and Injury Prevention. Sport Med. 2005;35:235-56. doi:10.2165/00007256-  
788 200535030-00004.
- 789 50. Furlan AD, Giraldo M, Baskwill A, Irvin E, Imamura M. Massage for low-back pain. Cochrane  
790 Database Syst Rev. 2015;2015:CD001929. doi:10.1002/14651858.CD001929.pub3.
- 791 51. Furlan AD, Brosseau L, Imamura M, Irvin E. Massage for low-back pain: A systematic review  
792 within the framework of the Cochrane Collaboration Back Review Group. Spine. 2002;27:1896-910.  
793 doi:10.1097/00007632-200209010-00017.
- 794 52. Furlan AD, Imamura M, Dryden T, Irvin E. Massage for low-back pain: An updated systematic  
795 review within the framework of the Cochrane Back Review Group. Spine. 2009;34:1669-84.  
796 doi:10.1097/BRS.0b013e3181ad7bd6.
- 797 53. Johnson JC, Degenhardt BF. Who uses osteopathic manipulative treatment? A prospective,  
798 observational study conducted by DO-Touch.NET. J Am Osteopath Assoc. 2019;119:802-12.  
799 doi:10.7556/jaoa.2019.133.
- 800 54. Rubinstein SM, De Zoete A, Van Middelkoop M, Assendelft WJJ, De Boer MR, Van Tulder MW.  
801 Benefits and harms of spinal manipulative therapy for the treatment of chronic low back pain:  
802 Systematic review and meta-analysis of randomised controlled trials. BMJ. 2019;364:1-15.  
803 doi:10.1136/bmj.l689.
- 804 55. Switters JM, Podar S, Perraton L, Machotka Z. Is visceral manipulation beneficial for patients  
805 with low back pain? A systematic review of the literature. Int J Osteopath Med. 2019;33:16-23.  
806 doi:10.1016/j.ijosm.2019.09.002.
- 807 56. Verhaeghe N, Schepers J, van Dun P, Annemans L. Osteopathic care for spinal complaints: A  
808 systematic literature review. PLoS One. 2018;13:e0206284. doi:10.1371/journal.pone.0206284.

## Osteopathy and Muscle Tone

- 809 57. Franke H, Franke JD, Fryer G. Osteopathic manipulative treatment for chronic nonspecific neck  
810 pain: A systematic review and meta-analysis. *Int J Osteopath Med*. 2015;18:255-67.  
811 doi:10.1016/j.ijosm.2015.05.003.
- 812 58. Dal Farra F, Risio RG, Vismara L, Bergna A. Effectiveness of osteopathic interventions in chronic  
813 non-specific low back pain: A systematic review and meta-analysis. *Complement Ther Med*.  
814 2021;56:102616. doi:10.1016/j.ctim.2020.102616.
- 815 59. Franke H, Franke JD, Fryer G. Osteopathic manipulative treatment for nonspecific low back  
816 pain: A systematic review and meta-analysis. *BMC Musculoskelet Disord*. 2014;15:1-18.  
817 doi:10.1186/1471-2474-15-286.
- 818 60. Licciardone JC, Brimhall AK, King LN. Osteopathic manipulative treatment for low back pain: A  
819 systematic review and meta-analysis of randomized controlled trials. *BMC Musculoskelet Disord*.  
820 2005;6:1-12. doi:10.1186/1471-2474-6-43.
- 821 61. Franke H, Franke J-D, Belz S, Fryer G. Osteopathic manipulative treatment for low back and  
822 pelvic girdle pain during and after pregnancy: A systematic review and meta-analysis. *J Bodyw Mov*  
823 *Ther*. 2017;21:752-62. doi:10.1016/j.jbmt.2017.05.014.
- 824 62. Licciardone JC, Gatchel RJ. Osteopathic medical care with and without osteopathic  
825 manipulative treatment in patients with chronic low back pain: A pain registry-based study. *J Am*  
826 *Osteopath Assoc*. 2020;120:64-73. doi:10.7556/jaoa.2020.016.
- 827 63. Franzetti M, Dries E, Stevens B, Berkowitz L, Yao SC. Support for osteopathic manipulative  
828 treatment inclusion in chronic pain management guidelines: a narrative review. *J Osteopath Med*.  
829 2021;121:307-17. doi:10.1515/jom-2019-0284.
- 830 64. Verhaeghe N, Schepers J, van Dun P, Annemans L. Osteopathic care for low back pain and neck  
831 pain: A cost-utility analysis. *Complement Ther Med*. 2018;40:207-13.  
832 doi:10.1016/j.ctim.2018.06.001.
- 833 65. Nguyen C, Boutron I, Zegarra-Parodi R, Baron G, Alami S, Sanchez K, et al. Effect of  
834 Osteopathic Manipulative Treatment vs Sham Treatment on Activity Limitations in Patients With  
835 Nonspecific Subacute and Chronic Low Back Pain A Randomized Clinical Trial. *JAMA Intern Med*.  
836 2021;181:620-30. doi:10.1001/jamainternmed.2021.0005.
- 837 66. Orrock PJ, Myers SP. Osteopathic intervention in chronic non-specific low back pain: A  
838 systematic review. *BMC Musculoskelet Disord*. 2013;14:1-7. doi:10.1186/1471-2474-14-129.
- 839 67. Posadzki P, Ernst E. Osteopathy for musculoskeletal pain patients: A systematic review of  
840 randomized controlled trials. *Clin Rheumatol*. 2011;30:285-91. doi:10.1007/s10067-010-1600-6.



## Osteopathy and Muscle Tone

68. Lewis R, Gómez Álvarez CB, Rayman M, Lanham-New S, Woolf A, Mobasheri A. Strategies for optimising musculoskeletal health in the 21st century. *BMC Musculoskelet Disord*. 2019;20:1-15. doi:10.1186/s12891-019-2510-7.
69. Dunn M, Rushton AB, Mistry J, Soundy A, Heneghan NR. Which biopsychosocial factors are associated with the development of chronic musculoskeletal pain? Protocol for an umbrella review of systematic reviews. *BMJ Open*. 2021;11:e053941. doi:10.1136/bmjopen-2021-053941.
70. Sampath KK, Darlow B, Tumilty S, Shillito W, Hanses M, Devan H, et al. Barriers and facilitators experienced by osteopaths in implementing a biopsychosocial (BPS) framework of care when managing people with musculoskeletal pain - a mixed methods systematic review. *BMC Health Serv Res*. 2021;21:1-15. doi:10.1186/s12913-021-06720-w.
71. Hu X, Lei D, Li L, Leng Y, Yu Q, Wei X, et al. Quantifying paraspinal muscle tone and stiffness in young adults with chronic low back pain: a reliability study. *Sci Rep*. 2018;8:1-10. doi:10.1038/s41598-018-32418-x.
72. Lo WLA, Yu Q, Mao Y, Li W, Hu C, Li L. Lumbar muscles biomechanical characteristics in young people with chronic spinal pain. *BMC Musculoskelet Disord*. 2019;20:1-9. doi:10.1186/s12891-019-2935-z.
73. Chin J, Qiu W, Lomiguen CM, Volokitin M. Osteopathic Manipulative Treatment in Tension Headaches. *Cureus*. 2020;12:e12040. doi:10.7759/cureus.12040.
74. Tramontano M, Cerritelli F, Piras F, Spanò B, Tamburella F, Piras F, et al. Brain Connectivity Changes after Osteopathic Manipulative Treatment: A Randomized Manual Placebo-Controlled Trial. *Brain Sci*. 2020;10:1-15. doi:10.3390/brainsci10120969.
75. Goldfinger MS, Moriarty S, DelPlato K, Yao SC, Leder A, Mancini JD. An osteopathic, non pharmacologic approach to parkinson's disease, restless leg syndrome & essential tremor. *Osteopath Fam Physician*. 2017;9:30-8. doi:10.1016/ofp.v9i6.525.
76. Collebrusco L, Fabri S, Furfaro A, Tanini I, Lombardini R, Rizza A, et al. Osteopathy and Emergency: A Model of Osteopathic Treatment Aimed at Managing the Post-Traumatic Stress - Brief and Useful Guide - Part 2. *Health*. 2018;10:1597-608. doi:10.4236/health.2018.1011120.
77. Nair K, Masi AT, Andonian BJ, Barry AJ, Coates BA, Dougherty J, et al. Stiffness of resting lumbar myofascia in healthy young subjects quantified using a handheld myotonometer and concurrently with surface electromyography monitoring. *J Bodyw Mov Ther*. 2016;20:388-96. doi:10.1016/j.jbmt.2015.12.005.
78. Knutson GA, Owens EF. Active and passive characteristics of muscle tone and their relationship to models of subluxation/joint dysfunction: Part I. *J Can Chiropr Assoc*. 2003;47:168-79.



## Osteopathy and Muscle Tone

79. Masi AT, Hannon JC. Human resting muscle tone (HRMT): Narrative introduction and modern concepts. *J Bodyw Mov Ther.* 2008;12:320-32. doi:10.1016/j.jbmt.2008.05.007.
80. Mense S, Masi AT. Increased Muscle Tone as a Cause of Muscle Pain. In: *Muscle Pain: Understanding the Mechanisms.* 2010. p. 207-49. doi:10.1007/978-3-540-85021-2.
81. Schoenrock B, Zander V, Dern S, Limper U, Mulder E, Verakšitš A, et al. Bed rest, exercise countermeasure and reconditioning effects on the human resting muscle tone system. *Front Physiol.* 2018;9:1-20. doi:10.3389/fphys.2018.00810.
82. Boesler D, Warner M, Alpers A, Finnerty EP, Kilmore MA. Efficacy of high-velocity low-amplitude manipulative technique in subjects with low-back pain during menstrual cramping. *J Am Osteopath Assoc.* 1993;93:203-14. doi:10.7556/jaoa.1993.93.2.203.
83. Korotkov K, Shelkov O, Shevtsov A, Mohov D, Paoletti S, Mirosnichenko D, et al. Stress reduction with osteopathy assessed with GDV electrophotonic imaging: Effects of osteopathy treatment. *J Altern Complement Med.* 2012;18:251-7. doi:10.1089/acm.2010.0853.
84. Rajaii RM, Cox GJ, Schneider RP. Role of osteopathic manipulative treatment in the management of stiff person syndrome. *J Am Osteopath Assoc.* 2015;115:394-8. doi:10.7556/jaoa.2015.081.
85. Alexander N, Rastelli A, Webb T, Rajendran D. The validity of lumbo-pelvic landmark palpation by manual practitioners: a systematic review. *Int J Osteopath Med.* 2021;39:10-20. doi:10.1016/j.ijosm.2020.10.008.
86. Basile F, Petracca M, Scionti R. Diagnostic reliability of osteopathic tests: A systematic review. *Int J Osteopath Med.* 2017;25:21-9. doi:10.1016/j.ijosm.2017.03.004.
87. May S, Littlewood C, Bishop A. Reliability of procedures used in the physical examination of non-specific low back pain: A systematic review. *Aust J Physiother.* 2006;52:91-102. doi:10.1016/S0004-9514(06)70044-7.
88. Najm WI, Seffinger MA, Mishra SI, Dickerson VM, Adams A, Reinsch S, et al. Content validity of manual spinal palpatory exams - A systematic review. *BMC Complement Altern Med.* 2003;3:1-14.
89. Póvoa LC, Ferreira APA, Silva JG. Validation of palpatory methods for evaluating anatomical bone landmarks of the cervical spine: A systematic review. *J Manipulative Physiol Ther.* 2015;38:302-10. doi:10.1016/j.jmpt.2015.04.002.
90. Cooperstein R, Hickey M. The reliability of palpating the posterior superior iliac spine: A systematic review. *J Can Chiropr Assoc.* 2016;60:36-46.
91. Stochkendahl MJ, Christensen HW, Hartvigsen J, Vach W, Haas M, Hestbaek L, et al. Manual

## Osteopathy and Muscle Tone

- 906 examination of the spine: a systematic critical literature review of reproducibility. J Manipulative  
907 Physiol Ther. 2006;29:475-85. doi:10.1016/j.jmpt.2006.06.011.
- 908 92. Nolet PS, Yu H, Côté P, Meyer AL, Kristman VL, Sutton D, et al. Reliability and validity of  
909 manual palpation for the assessment of patients with low back pain: a systematic and critical  
910 review. Chiropr Man Ther. 2021;29:1-20.
- 911 93. Chen G, Wu J, Chen G, Lu Y, Ren W, Xu W, et al. Reliability of a portable device for quantifying  
912 tone and stiffness of quadriceps femoris and patellar tendon at different knee flexion angles. PLoS  
913 One. 2019;14:e0220521. doi:10.1371/journal.pone.0220521.
- 914 94. Hsu JJ, Stasiak AM, Ranganathan K, Adelman EE, Janis JE, Cederna PS, et al. Morphometric  
915 Evaluation of the Frontal Migraine Trigger Site. Plast Reconstr Surg. 2018;141:726-32.  
916 doi:10.1097/PRS.0000000000004296.
- 917 95. Durão APR, Morosolli A, Brown J, Jacobs R. Masseter muscle measurement performed by  
918 ultrasound: A systematic review. Dentomaxillofac Radiol. 2017;46:20170052.  
919 doi:10.1259/dmfr.20170052.
- 920 96. Salavati M, Akhbari B, Ebrahimi Takamjani I, Ezzati K, Haghighatkah H. Reliability of the Upper  
921 Trapezius Muscle and Fascia Thickness and Strain Ratio Measures by Ultrasonography and  
922 Sonoelastography in Participants With Myofascial Pain Syndrome. J Chiropr Med. 2017;16:316-23.  
923 doi:10.1016/j.jcm.2017.06.003.
- 924 97. Pinar Y, Govsa F, Ozer MA, Ertam I. Anatomocosmetic implication rules of the corrugator  
925 supercilii muscle for youthful eye appearance. Surg Radiol Anat. 2016;38:1045-51.  
926 doi:10.1007/s00276-016-1666-1.
- 927 98. Azaroual MF, Fikri M, Abouqal R, Benyahya H, Zaoui F. Relationship between dimensions of  
928 muscles of mastication (masseter and lateral pterygoid) and skeletal dimensions: Study of 40 cases.  
929 Int Orthod. 2014;12:111-24. doi:10.1016/j.ortho.2013.09.001.
- 930 99. Tiwari R, Snow GB. Role of myocutaneous flaps in reconstruction of the head and neck. J  
931 Laryngol Otol. 1983;97:441-58. doi:10.1017/s0022215100094378.
- 932 100. Schulz KF, Altman DG, Moher D, CONSORT Group. CONSORT 2010 Statement: updated  
933 guidelines for reporting parallel group randomised trials. BMJ. 2010;340:698-702.  
934 doi:10.1136/bmj.c332.
- 935 101. Moher D, Hopewell S, Schulz KF, Montori V, Gøtzsche PC, Devereaux PJ, et al. CONSORT 2010  
936 Explanation and Elaboration: updated guidelines for reporting parallel group randomised trials.  
937 BMJ. 2010;340:1-28. doi:10.1136/bmj.c869.

## Osteopathy and Muscle Tone

- 938 102. McAlister FA, Straus SE, Sackett DL, Altman DG. Analysis and Reporting of Factorial Trials: A  
939 Systematic Review. *JAMA*. 2003;289:2545-53. doi:10.1001/jama.289.19.2545.
- 940 103. World Medical Association. World Medical Association Declaration of Helsinki: Ethical Principles  
941 for Medical Research Involving Human Subjects. *JAMA*. 2013;310:2191-4.  
942 doi:10.1001/jama.2013.281053.
- 943 104. Létocart AJ, Mabesoone F, Charleux F, Couppé C, Svensson RB, Marin F, et al. Muscles  
944 adaptation to aging and training: architectural changes - a randomised trial. *BMC Geriatr*.  
945 2021;21:1-18. doi:10.1186/s12877-020-02000-0.
- 946 105. Agyapong-Badu S, Warner M, Samuel D, Stokes M. Measurement of ageing effects on muscle  
947 tone and mechanical properties of rectus femoris and biceps brachii in healthy males and females  
948 using a novel hand-held myometric device. *Arch Gerontol Geriatr*. 2016;62:59-67.  
949 doi:10.1016/j.archger.2015.09.011.
- 950 106. Ghaoui R, Clarke N, Hollingworth P, Needham M. Muscle disorders: The latest investigations.  
951 *Intern Med J*. 2013;43:970-8. doi:10.1111/imj.12234.
- 952 107. Tozzi P. A unifying neuro-fasciogenic model of somatic dysfunction - Underlying mechanisms  
953 and treatment - Part II. *J Bodyw Mov Ther*. 2015;19:526-43. doi:10.1016/j.jbmt.2015.03.002.
- 954 108. Minasny B. Understanding the process of fascial unwinding. *Int J Ther Massage Bodyw*.  
955 2009;2:10-7. doi:10.3822/ijtm.v2i3.43.
- 956 109. Moore SD, Laudner KG, McLoda TA, Shaffer MA. The immediate effects of muscle energy  
957 technique on posterior shoulder tightness: A randomized controlled trial. *J Orthop Sports Phys*  
958 *Ther*. 2011;41:400-7. doi:10.2519/jospt.2011.3292.
- 959 110. Harrer G. The Fascial Distortion Model originated by Stephen P. Typaldos. In: Liem T, Tozzi P,  
960 Chila A, editors. *Fascia in the Osteopathic Field*. Edinburgh: Handspring Publishing; 2017. p. 359-68.
- 961 111. Myoton. MyotonPRO User Manual. 2013.  
962 [https://www.myoton.com/UserFiles/Updates/MyotonPRO\\_User\\_Manual.pdf](https://www.myoton.com/UserFiles/Updates/MyotonPRO_User_Manual.pdf).
- 963 112. Garcia-Bernal MI, Heredia-Rizo AM, Gonzalez-Garcia P, Cortés-Vega MD, Casuso-Holgado MJ.  
964 Validity and reliability of myotonometry for assessing muscle viscoelastic properties in patients with  
965 stroke: a systematic review and meta-analysis. *Sci Rep*. 2021;11:1-12. doi:10.1038/s41598-021-  
966 84656-1.
- 967 113. Roch M, Morin M, Gaudreault N. The MyotonPRO: A reliable tool for quantifying the viscoelastic  
968 properties of a trigger point on the infraspinatus in non-traumatic chronic shoulder pain. *J Bodyw*  
969 *Mov Ther*. 2020;24:379-85. doi:10.1016/j.jbmt.2020.05.002.

## Osteopathy and Muscle Tone

- 970 114. Kim KR, Shin HS, Lee SB, Hwang HS, Shin HJ. Effects of Negative Pressure Soft Tissue Therapy  
971 to Ankle Plantar Flexor on Muscle Tone, Muscle Stiffness, and Balance Ability in Patients with  
972 Stroke. *J Int Acad Phys Ther Res.* 2018;9:1468-74. doi:10.20540/JIAPTR.2018.9.2.1468.
- 973 115. Wang JS. Therapeutic effects of massage and electrotherapy on muscle tone, stiffness and  
974 muscle contraction following gastrocnemius muscle fatigue. *J Phys Ther Sci.* 2017;29:144-7.  
975 doi:10.1589/jpts.29.144.
- 976 116. Kocur P, Wilski M, Lewandowski J, Łochyński D. Female Office Workers With Moderate Neck  
977 Pain Have Increased Anterior Positioning of the Cervical Spine and Stiffness of Upper Trapezius  
978 Myofascial Tissue in Sitting Posture. *PM&R.* 2019;11:476-82. doi:10.1016/j.pmrj.2018.07.002.
- 979 117. Kisilewicz A, Madeleine P, Ignasiak Z, Ciszek B, Kawczynski A, Larsen RG. Eccentric Exercise  
980 Reduces Upper Trapezius Muscle Stiffness Assessed by Shear Wave Elastography and Myotonometry.  
981 *Front Bioeng Biotechnol.* 2020;8:1-9. doi:10.3389/fbioe.2020.00928.
- 982 118. Taş S, Yaşar Ü, Kaynak BA. Interrater and Intrarater Reliability of a Handheld Myotonometer in  
983 Measuring Mechanical Properties of the Neck and Orofacial Muscles. *J Manipulative Physiol Ther.*  
984 2021;44:42-8. doi:10.1016/j.jmpt.2020.08.002.
- 985 119. Kisilewicz A, Janusiak M, Szafraniec R, Smoter M, Ciszek B, Madeleine P, et al. Changes in  
986 Muscle Stiffness of the Trapezius Muscle after Application of Ischemic Compression into Myofascial  
987 Trigger Points in Professional Basketball Players. *J Hum Kinet.* 2018;64:35-45. doi:10.2478/hukin-  
988 2018-0043.
- 989 120. Janis JE, Ghavami A, Lemmon JA, Leedy JE, Guyuron B. Anatomy of the corrugator supercilii  
990 muscle: Part I. Corrugator topography. *Plast Reconstr Surg.* 2007;120:1647-53.  
991 doi:10.1097/01.prs.0000282725.61640.e1.
- 992 121. Janis JE, Ghavami A, Lemmon JA, Leedy JE, Guyuron B. The anatomy of the corrugator  
993 supercilii muscle: Part II. Supraorbital nerve branching patterns. *Plast Reconstr Surg.* 2008;121:233-  
994 40. doi:10.1097/01.prs.0000299260.04932.38.
- 995 122. Lee JY, Kim JN, Yoo JY, Hu KS, Kim HJ, Song WC, et al. Topographic anatomy of the masseter  
996 muscle focusing on the tendinous digitation. *Clin Anat.* 2012;25:889-92. doi:10.1002/ca.22024.
- 997 123. Kitai N, Fujii Y, Murakami S, Furukawa S, Kreiborg S, Takada K. Human masticatory muscle  
998 volume and zygomatico-mandibular form in adults with mandibular prognathism. *J Dent Res.*  
999 2002;81:752-6. doi:10.1177/154405910208101106.
- 1000 124. Kawczyńska A, Mroczek D, Andersen RE, Stefaniak T, Arendt-Nielsen L, Madeleine P. Trapezius  
1001 viscoelastic properties are heterogeneously affected by eccentric exercise. *J Sci Med Sport.*  
1002 2018;21:864-9. doi:https://doi.org/10.1016/j.jsams.2018.01.005.

## Osteopathy and Muscle Tone

- 1003 125. Faul F, Erdfelder E, Lang A-G, Buchner A. G\*Power 3: A flexible statistical power analysis  
1004 program for the social, behavioral, and biomedical sciences. Behav Res Methods. 2007;39:175-91.  
1005 doi:10.3758/bf03193146.
- 1006 126. Heinrich-Heine-Universität. G\*Power: Statistical Power Analyses for Windows and Mac. 2015.  
1007 <http://www.gpower.hhu.de/>.
- 1008 127. Dong C, Wedel M. BANOVA: An R Package for Hierarchical Bayesian ANOVA. J Stat Softw.  
1009 2017;81. doi:10.18637/jss.v081.i09.
- 1010 128. Westfall PH, Johnson WO, Utts JM. A Bayesian perspective on the Bonferroni adjustment.  
1011 Biometrika. 1997;84:419-27. doi:10.1093/biomet/84.2.419.
- 1012 129. Kang H. The prevention and handling of the missing data. Korean J Anesthesiol. 2013;64:402-  
1013 6. doi:10.4097/kjae.2013.64.5.402.
- 1014 130. Coates B, Barry A, Dougherty J, Schaefer E, Kelly J, Aldag J, et al. Quantifying intrinsic  
1015 properties of resting lumbar muscle in healthy subjects using a handheld myometer. In: Proceedings  
1016 of the 40th Annual Northeast Bioengineering Conference by IEEE Xplore. Boston; 2014.
- 1017 131. Ingber DE. Tensegrity and mechanotransduction. J Bodyw Mov Ther. 2008;12:198-200.  
1018 doi:10.1016/j.jbmt.2008.04.038.
- 1019 132. Albin SR, Koppenhaver SL, Bailey B, Blommel H, Fenter B, Lowrimore C, et al. The effect of  
1020 manual therapy on gastrocnemius muscle stiffness in healthy individuals. Foot. 2019;38:70-5.  
1021 doi:10.1016/j.foot.2019.01.006.
- 1022 133. Kisilewicz A, Urbaniak M, Kawczyński A. Effect of muscle energy technique on calf muscle  
1023 stiffness increased after eccentric exercise in athletes. J Kinesiol Exerc Sci. 2018;28:21-9.  
1024 doi:10.5604/01.3001.0012.7985.
- 1025 134. Chang TT, Li Z, Zhu YC, Wang XQ, Zhang ZJ. Effects of Self-Myofascial Release Using a Foam  
1026 Roller on the Stiffness of the Gastrocnemius-Achilles Tendon Complex and Ankle Dorsiflexion Range  
1027 of Motion. Front Physiol. 2021;12:1-9. doi:10.3389/fphys.2021.718827.
- 1028 135. Pérez-Bellmunt A, Labata-Lezaun N, Llurda-Almuzara L, Rodríguez-Sanz J, González-Rueda V,  
1029 Bueno-Gracia E, et al. Effects of a massage protocol in tensiomyographic and myotonometric  
1030 proprieties. Int J Environ Res Public Health. 2021;18:1-9. doi:10.3390/ijerph18083891.
- 1031 136. Gordon CM, Andrasik F, Schleip R, Birbaumer N, Rea M. Myofascial triggerpoint release (MTR)  
1032 for treating chronic shoulder pain: A novel approach. J Bodyw Mov Ther. 2016;20:614-22.  
1033 doi:10.1016/j.jbmt.2016.01.009.
- 1034 137. Park SJ, Kim SH, Kim SH. Effects of thoracic mobilization and extension exercise on thoracic

## Osteopathy and Muscle Tone

- 1035 alignment and shoulder function in patients with subacromial impingement syndrome: A  
1036 randomized controlled pilot study. *Healthcare*. 2020;8:1-11. doi:10.3390/healthcare8030316.
- 1037 138. Alcaraz-Clariana S, García-Luque L, Garrido-Castro JL, Carmona-Pérez C, Rodrigues-de-Souza  
1038 DP, Fernández-de-las-Peñas C, et al. Influence of Spinal Movements Associated with Physical  
1039 Evaluation on Muscle Mechanical Properties of the Lumbar Paraspinal in Subjects with Acute Low  
1040 Back Pain. *Diagnostics*. 2022;12:1-10.
- 1041 139. Hamilton RI, Garden CLP, Brown SJ. Immediate effect of a spinal mobilisation intervention on  
1042 muscle stiffness, tone and elasticity in subjects with lower back pain - A randomized cross-over  
1043 trial. *J Bodyw Mov Ther*. 2022;29:60-7. doi:10.1016/j.jbmt.2021.09.032.
- 1044 140. Taş S, Salkın Y. An investigation of the sex-related differences in the stiffness of the Achilles  
1045 tendon and gastrocnemius muscle: Inter-observer reliability and inter-day repeatability and the  
1046 effect of ankle joint motion. *Foot*. 2019;41:44-50. doi:10.1016/j.foot.2019.09.003.
- 1047 141. Ilahi S, Masi AT, White A, Devos A, Henderson J, Nair K. Quantified biomechanical properties  
1048 of lower lumbar myofascia in younger adults with chronic idiopathic low back pain and matched  
1049 healthy controls. *Clin Biomech*. 2020;73:78-85. doi:10.1016/j.clinbiomech.2019.12.026.
- 1050 142. Wu Z, Wang Y, Ye Z, Guan Y, Ye X, Chen Z, et al. Effects of Age and Sex on Properties of  
1051 Lumbar Erector Spinae in Healthy People: Preliminary Results From a Pilot Study. *Front Physiol*.  
1052 2021;12:1-10. doi:10.3389/fphys.2021.718068.
- 1053 143. Ng JKF, Richardson CA, Kippers V, Parnianpour M. Relationship between muscle fiber  
1054 composition and functional capacity of back muscles in healthy subjects and patients with back  
1055 pain. *J Orthop Sports Phys Ther*. 1998;27:389-402. doi:10.2519/jospt.1998.27.6.389.
- 1056 144. Couper DJ, Hosking JD, Cislér RA, Gastfriend DR, Kivlahan DR. Factorial designs in clinical  
1057 trials: Options for combination treatment studies. *J Stud Alcohol Drugs*. 2005;15:24-32.  
1058 doi:10.15288/jsas.2005.s15.24.
- 1059 145. Simmons JP, Nelson LD, Simonsohn U. False-positive psychology: Undisclosed flexibility in data  
1060 collection and analysis allows presenting anything as significant. *Psychol Sci*. 2011;22:1359-66.  
1061 doi:10.1177/0956797611417632.
- 1062 146. Bizzini M, Mannion AF. Reliability of a new, hand-held device for assessing skeletal muscle  
1063 stiffness. *Clin Biomech*. 2003;18:459-61. doi:10.1016/S0268-0033(03)00042-1.
- 1064 147. Kerins CM, Moore SD, Butterfield TA, McKeon PO, Uhl TL. Reliability of the myotonometer for  
1065 assessment of posterior shoulder tightness. *Int J Sports Phys Ther*. 2013;8:248-55.
- 1066 148. Lorenc ZP, Smith S, Nestor M, Nelson D, Moradi A. Understanding the functional anatomy of



## Osteopathy and Muscle Tone

- 1067 the frontalis and glabellar complex for optimal aesthetic botulinum toxin type A therapy. *Aesthetic*  
1068 *Plast Surg.* 2013;37:975-83. doi:10.1007/s00266-013-0178-1.
- 1069 149. Macdonald MR, Spiegel JH, Raven RB, Kabaker SS, Maas CS. An anatomical approach to  
1070 glabellar rhytids. *JAMA Otolaryngol - Head Neck Surg.* 1998;124:1315-20.  
1071 doi:10.1001/archotol.124.12.1315.
- 1072 150. Weir A, Veger SAS, Van De Sande HBA, Bakker EWP, De Jonge S, Tol JL. A manual therapy  
1073 technique for chronic adductor-related groin pain in athletes: A case series. *Scand J Med Sci Sport.*  
1074 2009;19:616-20. doi:10.1111/j.1600-0838.2008.00841.x.
- 1075 151. Simons DG, Mense S. Understanding and measurement of muscle tone as related to clinical  
1076 muscle pain. *Pain.* 1998;75:1-17. doi:10.1016/S0304-3959(97)00102-4.
- 1077 152. Standley PR. My personal journey that led to the crossroads of interdisciplinary manual  
1078 medicine research: Serendipitous opportunities afforded a basic scientist. *J Am Osteopath Assoc.*  
1079 2013;113:179-83. doi:10.7556/jaoa.2013.113.2.179.
- 1080 153. Standley PR. Towards a Rosetta Stone of manual therapeutic methodology. *J Bodyw Mov Ther.*  
1081 2014;18:586-7. doi:10.1016/j.jbmt.2014.06.004.
- 1082 154. Alcaraz-Clariana S, García-Luque L, Garrido-Castro JL, Fernández-de-las-Peñas C, Carmona-  
1083 Pérez C, Rodrigues-de-Souza DP, et al. Paravertebral Muscle Mechanical Properties and Spinal  
1084 Range of Motion in Patients with Acute Neck or Low Back Pain: A Case-Control Study. *Diagnostics.*  
1085 2021;11:1-21. doi:10.3390/diagnostics11020352.
- 1086 155. Wu Z, Zhu Y, Xu W, Liang J, Guan Y, Xu X. Analysis of Biomechanical Properties of the Lumbar  
1087 Extensor Myofascia in Elderly Patients with Chronic Low Back Pain and That in Healthy People.  
1088 *Biomed Res Int.* 2020;2020:7649157. doi:10.1155/2020/7649157.
- 1089 156. Andonian BJ, Masi AT, Aldag JC, Barry AJ, Coates BA, Emrich K, et al. Greater Resting Lumbar  
1090 Extensor Myofascial Stiffness in Younger Ankylosing Spondylitis Patients Than Age-Comparable  
1091 Healthy Volunteers Quantified by Myotonometry. *Arch Phys Med Rehabil.* 2015;96:2041-7.  
1092 doi:10.1016/j.apmr.2015.07.014.
- 1093 157. Garrido-Castro JL, Aranda-Valera IC, Peña-Amaro J, Martínez-Galisteo A, González-Navas C,  
1094 Rodrigues-De-Souza DP, et al. Mechanical properties of lumbar and cervical paravertebral muscles  
1095 in patients with axial spondyloarthritis: A case-control study. *Diagnostics.* 2021;11:1-12.  
1096 doi:10.3390/diagnostics11091662.
- 1097 158. White A, Abbott H, Masi AT, Henderson J, Nair K. Biomechanical properties of low back  
1098 myofascial tissue in younger adult ankylosing spondylitis patients and matched healthy control  
1099 subjects. *Clin Biomech.* 2018;57:67-73. doi:10.1016/j.clinbiomech.2018.06.006.

## Osteopathy and Muscle Tone

- 1100 159. Lederer AK, Maly C, Weinert T, Huber R. Tissue Stiffness is Not Related to Pain Experience: An  
 1101 Individually Controlled Study in Patients with Chronic Neck and Back Pain. Evidence-Based  
 1102 Complement Altern Med. 2019;2019:1907168. doi:10.1155/2019/1907168.

1103



## **DECLARATIONS**

### **Abbreviations:**

**MRT:** Myofascial Release Technique; **MET:** Muscle Energy Technique; **STT:** Soft Tissue Technique; **CS:** Corrugator Supercilii Muscle; **SM:** Superficial Masseter Muscle; **UT:** Upper Trapezius Muscle; **F:** Oscillation Frequency; **S:** Dynamic Stiffness; **D:** Logarithmic Decrement; **R:** Mechanical Stress Relaxation Time; **C:** Ratio of Deformation and Relaxation Time; **MSDs:** Musculoskeletal Disorders; **HRMT:** Human Resting Muscle Tone; **OMT:** Osteopathic Manipulative Treatment; **EMG:** Electromyography; **MPs:** Measurement Points.

### **Acknowledgements:**

We like to express our gratitude to (i) the students and staff of the Osteopathie Schule Deutschland for their participation and assistance during the trial; (ii) Alexander Karner, MSc, Christian Selzle, MSc, Stephan Rohde, MSc, and Charline Krohn for providing intellectual, organizational, and spatial support; (iii) Ass. Prof. Jan Porthun, MMSc for helpful discussions about the study design and statistics; and (iv) Dr. Christine Lohr, MSc, and Marius Dickmann, MSc for proofreading the manuscript and providing thoughtful comments.

### **Authors' contributions:**

**LB:** Conceptualization, Methodology, Writing - Original Draft, Writing - Review & Editing, Visualization, Supervision, Project administration; **JS:** Formal analysis, Investigation, Writing - Review & Editing, Visualization; **JR:** Investigation, Writing - Review & Editing; **BG:** Investigation, Writing - Review & Editing, Project

## Osteopathy and Muscle Tone

1126 administration; **CL**: Investigation, Writing - Review & Editing; **AK**: Formal analysis,  
1127 Writing - Review & Editing; **AB**: Formal analysis, Writing - Review & Editing; **TS**:  
1128 Writing - Review & Editing, Supervision.

### 1129 **Funding:**

1130 This research did not receive any specific grant from funding agencies in the public,  
1131 commercial, or not-for-profit sectors.

### 1132 **Availability of data and materials:**

1133 The datasets used and/or analysed during the current study are available from the  
1134 corresponding author on reasonable request.

### 1135 **Ethics approval and consent to participate:**

1136 This study has obtained informed consent from participants, was carried out in  
1137 accordance with the Declaration of Helsinki and was approved by the ethics  
1138 committee of the Osteopathic Research Institute (Nr. 020-01).

### 1139 **Consent for publication:**

1140 Written informed consent for publication of the images was obtained from the  
1141 subjects.

### 1142 **Competing interests:**

1143 The authors declare that they have no competing interests.
